# Supplementary material for: Existence and functions of a kisspeptin neuropeptide signaling system in a non-chordate deuterostome species
Source: eLife. 2020 Jun 9;9:e53370. doi: 10.7554/eLife.53370 (PMC7282810; doi:10.7554/eLife.53370)
Supplement: Figure 3—source data 1. [file elife-53370-fig3-data1.xlsx]

## Sheet: B1 AjKissR1 AjKiss1a
Time(s)	Hanks	100 pM	1 nM	10 nM	100 nM	1 μM			Log[AjKiss1a]M	AUC
1	0	0	0	0	0	0			-10	4.474
2	0.0274	0.0101	0.0197	0.0157	0.0011	0.0412			-9	6.715
3	0.0225	0.0186	0.0115	-0.0109	0.0203	0.0183			-8	8.793
4	0.0239	0.0122	-0.0035	-0.0112	0.0143	0.0312			-7	12.93
5	0.0185	0.0018	-0.0166	-0.0225	-0.0171	0.0166			-6	18.82
6	0.0132	0.0136	-0.0005	-0.008	0.0033	0.0149
7	0.0191	0.009	-0.0004	-0.046	-0.0008	0.0294
8	0.0211	0.0176	0.0179	0.0064	0.0165	0.0424			log(agonist) vs. response (three parameters)
9	0.0295	0.0136	0.0056	-0.0231	0.0225	0.0409			Best-fit values
10	0.011	0.0998	0.0744	0.0713	0.1114	0.2511			Bottom	5.962
11	0.0058	0.0779	0.0597	0.0827	0.095	0.2451			Top	19.65
12	0.0156	0.0958	0.0777	0.0869	0.1947	0.2657			LogEC50	-7.093
13	0.0153	0.0897	0.0677	0.0766	0.1568	0.2862			EC50	8.081e-08
14	0.0192	0.0962	0.0795	0.0954	0.1845	0.2899			Span	13.69
15	0.0049	0.0744	0.053	0.1041	0.1665	0.2741			Std. Error
16	0.0172	0.093	0.0849	0.1223	0.1905	0.3039			Bottom	1.017
17	0.0017	0.0819	0.0838	0.122	0.1829	0.2844			Top	2.046
18	0.0168	0.0888	0.0774	0.1127	0.1899	0.2516			LogEC50	0.2797
19	0.0246	0.1037	0.0752	0.1308	0.2284	0.3223			Span	2.143
20	0.0181	0.0827	0.0724	0.1058	0.2059	0.2594			95% CI (asymptotic)
21	0.021	0.0901	0.0641	0.1175	0.2105	0.2942			Bottom	1.585 to 10.34
22	0.0138	0.1006	0.0967	0.1251	0.1788	0.3046			Top	10.84 to 28.45
23	0.0156	0.0903	0.0806	0.1268	0.1786	0.2915			LogEC50	-8.296 to -5.889
24	0.0224	0.0935	0.0975	0.1391	0.2228	0.3171			EC50	5.056e-009 to 1.292e-006
25	0.0152	0.0888	0.0901	0.1164	0.217	0.3204			Span	4.466 to 22.91
26	-0.0172	0.0919	0.0916	0.182	0.2106	0.3343			Goodness of Fit
27	0.043	0.0696	0.0609	0.1411	0.1905	0.3045			Degrees of Freedom	2
28	0.0173	0.0744	0.0846	0.1706	0.184	0.3174			R square	0.963
29	0.0296	0.1043	0.1068	0.1221	0.2471	0.3439			Absolute Sum of Squares	4.76
30	0.0145	0.083	0.0981	0.1047	0.2155	0.3067			Sy.x	1.543
31	0.0103	0.0883	0.1126	0.1096	0.2324	0.3223
32	0.0243	0.0889	0.1295	0.1429	0.2414	0.3231			Number of points
33	0.0176	0.0896	0.1092	0.1352	0.2337	0.31			# of X values	5
34	0.0172	0.0923	0.1129	0.1517	0.305	0.2944			# Y values analyzed	5
35	0.0322	0.0796	0.114	0.1544	0.2962	0.2868
36	0.0245	0.0946	0.1322	0.1474	0.2556	0.3548
37	0.0218	0.0582	0.0848	0.1177	0.2472	0.3437
38	0.0459	0.0612	0.1088	0.1421	0.2481	0.292
39	0.0137	0.0735	0.12	0.1409	0.2479	0.3009
40	0.0187	0.063	0.1126	0.1442	0.2471	0.3499
41	0.0291	0.0642	0.1117	0.1429	0.2293	0.323
42	0.0404	0.0743	0.1183	0.163	0.2486	0.3728
43	0.0186	0.0745	0.1269	0.1636	0.2468	0.3167
44	0.0318	0.0748	0.1341	0.1661	0.2177	0.3477
45	0.0174	0.0738	0.151	0.1708	0.2129	0.3229
46	0.0292	0.0633	0.1235	0.1561	0.2229	0.3002
47	0.0108	0.0761	0.1435	0.1647	0.2257	0.3463
48	0.0423	0.076	0.159	0.1545	0.2126	0.3394
49	0.0215	0.0844	0.1418	0.175	0.2153	0.3868
50	0.0277	0.0667	0.1582	0.1642	0.2129	0.3538
51	0.002	0.0791	0.1717	0.1676	0.2316	0.4256
52	0.0251	0.0526	0.1233	0.1712	0.207	0.3338
53	0.0255	0.0639	0.1544	0.1728	0.2234	0.3426
54	0.034	0.0616	0.1565	0.1754	0.2155	0.287
55	0.0444	0.0641	0.1287	0.1706	0.2479	0.3291
56	0.0143	0.0557	0.1334	0.1619	0.2558	0.2977
57	0.0325	0.0649	0.1461	0.1807	0.243	0.3579
58	0.029	0.0495	0.1427	0.1589	0.2572	0.3351
59	0.0454	0.0501	0.1405	0.1685	0.2317	0.2952
60	0.0221	0.0574	0.1483	0.1961	0.2277	0.3616
61	0.0338	0.0677	0.1482	0.2227	0.224	0.3474
62	0.0208	0.0479	0.1211	0.1838	0.2129	0.3119
63	0.037	0.0552	0.1412	0.1826	0.2299	0.3429
64	0.0177	0.0667	0.1703	0.2358	0.2567	0.3825
65	0.0548	0.055	0.1331	0.2156	0.2451	0.3153
66	0.0373	0.04	0.119	0.1933	0.2213	0.2878
67	0.0153	0.028	0.1107	0.1629	0.2303	0.303
68	0.0161	0.0607	0.1435	0.2011	0.2482	0.3523

## Sheet: B1 AjKissR2 AjKiss1a
Time(s)	Hanks	100 pM	1 nM	10 nM	100 nM	1 μM			Log[AjKiss1a]M	AUC
1	0	0	0	0	0	0			-10	7.592
2	0.0362	0.077	0.0639	0.0441	0.0633	0.0584			-9	11.14
3	0.0482	0.0668	0.0722	0.0712	0.0772	0.0721			-8	24.2
4	0.0517	0.0652	0.0691	0.0714	0.0575	0.0689			-7	24.83
5	0.0276	0.0658	0.0701	0.0764	0.0872	0.0371			-6	24.14
6	0.0387	0.0783	0.0501	0.1011	0.0897	0.0512
7	0.0455	0.0704	0.0594	0.1136	0.0938	0.0882
8	0.0364	0.0707	0.0704	0.0979	0.1048	0.0422
9	0.0462	0.0558	0.0708	0.1077	0.1387	0.0495			log(agonist) vs. response (three parameters)
10	0.0237	0.1211	0.1109	0.2163	0.2236	0.2006			Best-fit values
11	0.0155	0.1072	0.1231	0.2016	0.2199	0.2004			Bottom	6.057
12	0.0181	0.1067	0.0934	0.2111	0.2626	0.1976			Top	25.34
13	0.0054	0.0818	0.1161	0.2299	0.23	0.2223			LogEC50	-8.703
14	0.0416	0.1306	0.1172	0.2356	0.2619	0.2095			EC50	1.984e-09
15	0.0239	0.108	0.1256	0.2625	0.2573	0.2768			Span	19.28
16	-0.0013	0.1204	0.0945	0.2301	0.2849	0.2473			Std. Error
17	0.0114	0.1183	0.1115	0.2475	0.2785	0.2304			Bottom	2.359
18	0.0059	0.1161	0.1386	0.2641	0.291	0.2409			Top	1.378
19	0.0005	0.1197	0.1448	0.2555	0.3044	0.2436			LogEC50	0.2597
20	-0.0108	0.1198	0.1498	0.2917	0.3144	0.2615			Span	2.518
21	0.0079	0.1073	0.1479	0.305	0.3361	0.3052			95% CI (asymptotic)
22	-0.0187	0.1087	0.1719	0.3219	0.3261	0.3632			Bottom	-4.092 to 16.21
23	-0.004	0.1218	0.1536	0.2917	0.3637	0.3026			Top	19.41 to 31.26
24	0.005	0.0995	0.1749	0.3426	0.336	0.3262			LogEC50	-9.82 to -7.585
25	0.0314	0.1154	0.1669	0.3427	0.3741	0.3229			EC50	1.513e-010 to 2.6e-008
26	-0.0058	0.1072	0.1324	0.347	0.3689	0.3448			Span	8.444 to 30.11
27	0.0004	0.106	0.189	0.3629	0.4156	0.3758			Goodness of Fit
28	-0.0153	0.1157	0.1531	0.3549	0.408	0.3347			Degrees of Freedom	2
29	0.0071	0.1343	0.1632	0.413	0.4207	0.3585			R square	0.9717
30	-0.0189	0.1158	0.1778	0.4015	0.4059	0.4054			Absolute Sum of Squares	7.854
31	-0.0102	0.1056	0.1612	0.4017	0.4197	0.3931			Sy.x	1.982
32	0.0096	0.145	0.1722	0.4123	0.4205	0.3842
33	0.0161	0.1099	0.1761	0.391	0.4127	0.4062			Number of points
34	-0.005	0.1219	0.1587	0.4105	0.4015	0.3853			# of X values	5
35	-0.0014	0.1221	0.1887	0.4252	0.4191	0.4142			# Y values analyzed	5
36	-0.0093	0.1093	0.1881	0.406	0.4348	0.4057
37	0.0007	0.1041	0.1886	0.4199	0.4344	0.4343
38	-0.0113	0.1277	0.1641	0.4484	0.4438	0.4366
39	0.0025	0.1191	0.1954	0.4048	0.419	0.4557
40	-0.0246	0.1059	0.1951	0.4275	0.435	0.4243
41	-0.0248	0.1531	0.1992	0.3983	0.4513	0.4713
42	-0.0161	0.1265	0.2143	0.4514	0.47	0.478
43	-0.0041	0.1121	0.1841	0.4516	0.4648	0.4653
44	-0.0187	0.1185	0.1976	0.4689	0.4523	0.4713
45	-0.0017	0.1243	0.2088	0.474	0.438	0.4426
46	-0.0228	0.1287	0.1751	0.4513	0.4637	0.4581
47	-0.0209	0.153	0.1831	0.4797	0.4636	0.4412
48	-0.0393	0.1021	0.2003	0.5052	0.4735	0.4902
49	-0.007	0.1102	0.2451	0.4814	0.4563	0.476
50	-0.0217	0.1262	0.2356	0.4961	0.5183	0.4639
51	-0.0266	0.1135	0.2165	0.4877	0.4583	0.5016
52	-0.027	0.1397	0.2076	0.4523	0.4369	0.5117
53	-0.0026	0.1001	0.1808	0.4988	0.4958	0.4798
54	-0.0326	0.1097	0.2126	0.4945	0.5037	0.557
55	-0.007	0.1155	0.2021	0.4924	0.478	0.4984
56	-0.0167	0.1429	0.2145	0.4973	0.5085	0.4886
57	-0.0228	0.1168	0.226	0.4853	0.4715	0.5537
58	-0.0253	0.1286	0.2643	0.4982	0.5037	0.5559
59	-0.0285	0.1316	0.2032	0.4758	0.4831	0.4942
60	-0.0072	0.1322	0.2132	0.4966	0.4602	0.4867
61	-0.019	0.1381	0.2271	0.4737	0.4779	0.5244
62	-0.0047	0.1193	0.2051	0.4732	0.5064	0.5108
63	-0.0032	0.1641	0.2207	0.4851	0.512	0.5032
64	-0.0106	0.1258	0.2551	0.4939	0.4953	0.4406
65	-0.0306	0.1142	0.228	0.4976	0.4989	0.5021
66	-0.0306	0.1381	0.2068	0.5111	0.5223	0.5143
67	0.0128	0.1354	0.2202	0.5097	0.4788	0.5452
68	-0.0115	0.14	0.2358	0.5122	0.4995	0.4657

## Sheet: B2 AjKissR1 AjKiss1b
Time(s)	Hanks	100 pM	1 nM	10 nM	100 nM	1 μM			Log[AjKiss1b]M	AUC
1	0	0	0	0	0	0			-10	2.533
2	0.0048	0.0023	-0.026	-0.0023	0.0042	-0.0255			-9	3.731
3	0.0078	-0.018	-0.0234	-0.0189	0.0051	-0.019			-8	8.142
4	-0.0038	0.0019	-0.0187	0.0011	0.0092	-0.0281			-7	13.58
5	-0.011	0.0065	-0.0072	0.0228	0.0405	0.0043			-6	12.39
6	0.0016	-0.0052	-0.0107	0.0116	0.0033	0.0009
7	0.0123	-0.0239	-0.0282	-0.0098	0.0174	0.0176
8	0.0055	-0.0155	-0.0196	0.013	0.0278	0.0243
9	0.0047	-0.0017	0.0117	0.035	0.0787	0.0279			log(agonist) vs. response (three parameters)
10	-0.0217	0.0411	0.0079	0.0701	0.1477	0.0592			Best-fit values
11	-0.0003	0.0435	-0.0134	0.0099	0.1015	0.0661			Bottom	2.426
12	-0.0054	0.0077	0.0245	0.0539	0.1358	0.092			Top	13.32
13	0.0027	0.0104	-0.0085	0.0269	0.1318	0.0788			LogEC50	-8.094
14	0.0081	0.0021	-0.0202	0.0181	0.1422	0.0832			EC50	8.062e-09
15	0.0157	-0.0212	-0.0362	0.0247	0.129	0.1004			Span	10.89
16	-0.0012	0.0194	-0.0006	0.0156	0.1168	0.1344			Std. Error
17	0.0133	-0.0101	-0.0004	0.0227	0.1377	0.097			Bottom	0.8582
18	-0.0109	0.0255	0.018	0.0584	0.1779	0.1279			Top	0.8118
19	-0.0089	0.0175	0.0205	0.0525	0.1587	0.1352			LogEC50	0.2034
20	-0.017	0.0417	0.0439	0.0606	0.1866	0.1457			Span	1.101
21	-0.0116	0.0374	0.0098	0.0383	0.1524	0.1512			95% CI (asymptotic)
22	-0.0045	0.0289	0.0093	0.0678	0.1767	0.1584			Bottom	-1.267 to 6.118
23	-0.0263	0.0552	0.0265	0.1066	0.2115	0.1792			Top	9.824 to 16.81
24	-0.0046	0.0173	0.0192	0.0696	0.1716	0.1502			LogEC50	-8.969 to -7.219
25	-0.007	0.0303	0.0319	0.0618	0.1724	0.1707			EC50	1.075e-009 to 6.046e-008
26	-0.0237	0.0424	0.0387	0.1111	0.1865	0.179			Span	6.153 to 15.63
27	-0.0142	0.0312	0.0277	0.1007	0.1869	0.2142			Goodness of Fit
28	-0.0161	0.0327	0.0342	0.1083	0.2199	0.1877			Degrees of Freedom	2
29	-0.0195	0.0232	0.0608	0.1211	0.229	0.1931			R square	0.98
30	-0.01	0.0354	0.0214	0.1079	0.1902	0.2044			Absolute Sum of Squares	1.972
31	-0.0087	0.0179	0.05	0.1232	0.2069	0.1816			Sy.x	0.993
32	-0.02	0.0309	0.0411	0.1527	0.2225	0.2158
33	-0.0004	0.0205	0.0506	0.1194	0.1988	0.1859			Number of points
34	-0.0076	0.0076	0.0272	0.1195	0.2274	0.1983			# of X values	5
35	-0.0248	0.0446	0.0679	0.154	0.2469	0.2391			# Y values analyzed	5
36	-0.0119	0.0202	0.0674	0.1314	0.2304	0.2409
37	-0.0099	0.0239	0.0408	0.1305	0.2466	0.221
38	-0.0367	0.0584	0.0898	0.173	0.2763	0.2328
39	-0.0226	0.0634	0.0732	0.1364	0.2494	0.1537
40	-0.0075	0.0234	0.0326	0.1328	0.2281	0.2577
41	-0.0263	0.0385	0.0932	0.1737	0.2352	0.2185
42	-0.0299	0.0542	0.0752	0.1951	0.2564	0.2194
43	-0.0412	0.0779	0.088	0.1856	0.2941	0.2218
44	-0.0231	0.0406	0.0864	0.1823	0.2739	0.2397
45	-0.0226	0.0514	0.0663	0.1725	0.2553	0.2424
46	-0.0358	0.0669	0.109	0.2184	0.2796	0.2383
47	-0.0008	0.0426	0.042	0.1808	0.2383	0.2695
48	-0.0029	0.0362	0.0839	0.1757	0.2626	0.2715
49	-0.0259	0.0705	0.1011	0.1737	0.2731	0.2661
50	-0.0298	0.0619	0.087	0.1938	0.3022	0.2538
51	-0.0329	0.046	0.1111	0.192	0.2768	0.245
52	-0.0074	0.0314	0.077	0.1739	0.2458	0.2675
53	-0.0109	0.0485	0.1012	0.189	0.2736	0.2787
54	-0.0354	0.0627	0.1018	0.2079	0.3075	0.2352
55	-0.0471	0.0886	0.121	0.21	0.2935	0.318
56	-0.0091	0.0612	0.0796	0.1891	0.2934	0.2545
57	-0.03	0.052	0.0962	0.2143	0.2884	0.2712
58	-0.0101	0.0489	0.097	0.2021	0.2849	0.2878
59	-0.0313	0.0609	0.1117	0.226	0.2687	0.3022
60	-0.0253	0.0773	0.092	0.1814	0.2861	0.2675
61	-0.0234	0.0553	0.0846	0.1868	0.2848	0.2766
62	-0.0195	0.0589	0.106	0.1799	0.2751	0.2701
63	-0.0068	0.0454	0.1016	0.1961	0.2585	0.2632
64	-0.0192	0.0731	0.1222	0.1979	0.2792	0.2797
65	-0.0105	0.0738	0.0869	0.2198	0.2637	0.2862
66	-0.0277	0.0688	0.1145	0.2392	0.2949	0.2624
67	-0.0322	0.0838	0.1048	0.2088	0.3109	0.2639
68	-0.017	0.0588	0.1144	0.1884	0.2831	0.2855

## Sheet: B2 AjKissR2 AjKiss1b
Time(s)	Hanks	100 pM	1 nM	10 nM	100 nM	1 μM			Log[AjKiss1b]M	AUC
1	0	0	0	0	0	0			-10	5.49
2	0.0242	0.0011	-0.0002	-0.0605	0.0078	0.0278			-9	8.283
3	0.0141	0.004	0.0407	-0.0091	-0.0035	0.0142			-8	7.835
4	0.0105	0.0098	0.0006	-0.0337	0.016	0.0611			-7	10.77
5	0.0122	0.0153	-0.0001	-0.0308	-0.005	0.0384			-6	12.06
6	0.0073	-0.0059	0.0327	-0.0663	0.0164	0.0608
7	0.0091	0.0028	0.0262	-0.038	0.0358	0.0716
8	-0.0025	0.0081	0.02	-0.0333	0.0527	0.0547			log(agonist) vs. response (three parameters)
9	0.0039	0.0111	0.0293	-0.0271	0.0641	0.0992			Best-fit values
10	0.0122	0.0722	0.0808	0.0695	0.1204	0.1108			Bottom	6.715
11	-0.0095	0.0655	0.0692	0.0494	0.1327	0.1378			Top	12.19
12	-0.0144	0.044	0.1285	0.03	0.0957	0.0517			LogEC50	-7.479
13	0.0126	0.0539	0.0978	0.0762	0.1086	0.1035			EC50	3.317e-08
14	-0.023	0.0578	0.0739	0.0681	0.1117	0.1129			Span	5.478
15	-0.0014	0.0516	0.0837	0.0675	0.1278	0.1318			Std. Error
16	-0.0074	0.032	0.1063	0.068	0.1154	0.1857			Bottom	0.9794
17	-0.0038	0.0594	0.0831	0.083	0.1387	0.1627			Top	1.433
18	0.0033	0.0646	0.1136	0.1019	0.1175	0.1713			LogEC50	0.6152
19	0.0034	0.0716	0.0457	0.0631	0.1257	0.1537			Span	1.58
20	0.0034	0.0398	0.1144	0.0944	0.0774	0.1827			95% CI (asymptotic)
21	-0.0072	0.0416	0.1242	0.1115	0.1568	0.1456			Bottom	2.501 to 10.93
22	-0.0032	0.0796	0.1202	0.1159	0.1301	0.1649			Top	6.029 to 18.36
23	-0.0011	0.0719	0.1006	0.0823	0.1469	0.1912			LogEC50	-10.13 to -4.832
24	-0.0029	0.0667	0.1322	0.1092	0.186	0.1843			EC50	7.475e-011 to 1.472e-005
25	-0.0063	0.0863	0.1409	0.1076	0.1742	0.184			Span	-1.322 to 12.28
26	0.0085	0.058	0.1336	0.1048	0.1601	0.2221			Goodness of Fit
27	0.0086	0.0991	0.1323	0.1047	0.1171	0.1763			Degrees of Freedom	2
28	0.0084	0.0747	0.1263	0.1243	0.1702	0.1907			R square	0.8667
29	0.0107	0.0901	0.1764	0.1363	0.216	0.2231			Absolute Sum of Squares	3.55
30	-0.0058	0.0885	0.1663	0.1087	0.1906	0.2411			Sy.x	1.332
31	0.0026	0.0749	0.1301	0.1277	0.1484	0.1836
32	-0.01	0.0897	0.1282	0.1397	0.1953	0.1841			Number of points
33	-0.0047	0.0875	0.1723	0.1631	0.1724	0.2233			# of X values	5
34	0.0001	0.1032	0.1337	0.1059	0.1859	0.2047			# Y values analyzed	5
35	0.0004	0.0748	0.1827	0.1677	0.1988	0.2172
36	-0.0061	0.1037	0.1449	0.1604	0.2182	0.2271
37	-0.017	0.0935	0.1337	0.1495	0.1965	0.2372
38	0.0137	0.0985	0.1808	0.1387	0.1972	0.2538
39	-0.0049	0.1066	0.1002	0.1205	0.216	0.1844
40	-0.0301	0.1008	0.1531	0.1412	0.1955	0.2322
41	-0.0136	0.1198	0.2087	0.1636	0.1708	0.2266
42	-0.0064	0.0881	0.1671	0.2072	0.2127	0.2184
43	-0.0298	0.1283	0.1774	0.1309	0.2097	0.2527
44	-0.0095	0.1196	0.1645	0.1268	0.2024	0.2315
45	-0.0159	0.1208	0.1736	0.1402	0.215	0.224
46	-0.0312	0.0961	0.1575	0.1719	0.19	0.1982
47	-0.0171	0.1335	0.1456	0.1295	0.1958	0.2111
48	0.0015	0.124	0.1583	0.1801	0.2606	0.2159
49	-0.0578	0.1043	0.144	0.1333	0.2089	0.2199
50	-0.0368	0.1081	0.153	0.1741	0.1864	0.2107
51	0.012	0.0906	0.1527	0.1482	0.1724	0.2358
52	-0.0318	0.1416	0.1323	0.1546	0.2334	0.2152
53	-0.0342	0.1067	0.1377	0.1355	0.1883	0.2227
54	-0.0267	0.1233	0.1291	0.1781	0.2002	0.2286
55	-0.0551	0.1136	0.1874	0.1689	0.2613	0.2201
56	-0.0337	0.1015	0.1698	0.1902	0.1932	0.2087
57	-0.0406	0.1268	0.1739	0.1575	0.2397	0.2239
58	-0.0137	0.1238	0.1265	0.1879	0.2072	0.2275
59	-0.0371	0.1299	0.185	0.1564	0.2278	0.1992
60	-0.0398	0.1245	0.1708	0.1243	0.195	0.2084
61	-0.0211	0.1183	0.1883	0.1279	0.2307	0.2359
62	-0.0424	0.1012	0.1481	0.1489	0.1753	0.2138
63	-0.0522	0.1202	0.1402	0.1508	0.2041	0.2237
64	-0.0479	0.0936	0.1462	0.1404	0.1834	0.2116
65	-0.0193	0.1257	0.1117	0.1688	0.218	0.2189
66	-0.0442	0.102	0.1328	0.1476	0.2399	0.2195
67	-0.0401	0.0875	0.1633	0.1481	0.1997	0.2082
68	-0.0398	0.126	0.1568	0.147	0.2235	0.2503
