# Supplementary material for: Existence and functions of a kisspeptin neuropeptide signaling system in a non-chordate deuterostome species
Source: eLife. 2020 Jun 9;9:e53370. doi: 10.7554/eLife.53370 (PMC7282810; doi:10.7554/eLife.53370)
Supplement: Figure 4—source data 1. [file elife-53370-fig4-data1.xlsx]

## Sheet: Figure 4A
Time(s)	Hanks	DrKiss1-10 (1 μM)	DrKiss2-10 (1 μM)	XtKiss1b-10 (1 μM)	HsKiss1-10 (1 μM)
1	0	0	0	0	0
2	0.007	0.0104	0.0083	0.0192	0.0137
3	-0.022	0.0224	0.0113	0.0168	0.0027
4	-0.0355	0.0341	0.0117	0.0385	0.0154
5	-0.021	0.0481	0.0138	0.0634	0.0185
6	-0.0345	0.0266	0.038	0.0724	0.0005
7	-0.0308	0.0442	0.0497	0.0674	-0.024
8	-0.0193	0.0369	0.0239	0.0795	0.0061
9	-0.0122	0.038	0.0274	0.0546	-0.0095
10	0.041	0.1479	0.145	0.2765	0.4509
11	0.0167	0.1515	0.1543	0.2742	0.4524
12	0.0272	0.152	0.15	0.3067	0.4755
13	-0.0017	0.1596	0.1643	0.3145	0.4658
14	0.0134	0.1517	0.165	0.3395	0.4539
15	0.0416	0.1745	0.1504	0.292	0.4487
16	0.0343	0.1379	0.1577	0.3423	0.4649
17	-0.0033	0.1331	0.1747	0.3203	0.472
18	0.0162	0.1313	0.1987	0.3499	0.5102
19	0.0327	0.1451	0.1777	0.3273	0.4733
20	0.0383	0.1356	0.172	0.3381	0.4319
21	0.0188	0.1012	0.1875	0.323	0.4606
22	0.0518	0.1334	0.1854	0.3469	0.4678
23	0.0107	0.1315	0.1879	0.3541	0.4845
24	0.0009	0.1219	0.1531	0.3576	0.4925
25	0.0463	0.1445	0.1652	0.3294	0.4553
26	-0.0055	0.1337	0.2023	0.3498	0.4895
27	0.0487	0.131	0.1824	0.3282	0.4769
28	0.0303	0.1463	0.1933	0.3335	0.4693
29	0.035	0.1084	0.2083	0.3567	0.4875
30	0.0319	0.1354	0.2038	0.3364	0.4805
31	0.0194	0.0815	0.2287	0.3648	0.4941
32	0.0233	0.1216	0.1917	0.3874	0.4869
33	0.0342	0.1248	0.2097	0.3566	0.4521
34	0.0468	0.1041	0.2087	0.3829	0.4552
35	0.0501	0.1035	0.2268	0.4004	0.44
36	0.0401	0.1111	0.2033	0.3597	0.5089
37	0.0518	0.0864	0.2122	0.3941	0.4097
38	0.0482	0.1045	0.2161	0.3876	0.4851
39	0.0398	0.1264	0.2066	0.3676	0.4897
40	0.0465	0.1201	0.1942	0.4011	0.4373
41	0.0664	0.0984	0.2256	0.3854	0.4934
42	0.0409	0.131	0.2183	0.3931	0.5054
43	0.0476	0.1183	0.1987	0.4102	0.4508
44	0.0588	0.1204	0.2225	0.4116	0.4917
45	0.0341	0.0837	0.2072	0.443	0.4651
46	0.0454	0.1193	0.1975	0.4269	0.4992
47	0.0089	0.1155	0.2267	0.4187	0.4576
48	0.0487	0.1201	0.2458	0.4219	0.4382
49	0.0631	0.1285	0.2035	0.4111	0.4357
50	0.0448	0.1086	0.2453	0.462	0.4329
51	0.0451	0.1159	0.2481	0.4648	0.4559
52	0.0286	0.1406	0.2116	0.4297	0.4139
53	0.047	0.0938	0.2552	0.4471	0.4448
54	0.0483	0.1436	0.2529	0.4695	0.4308
55	0.0465	0.1077	0.2306	0.474	0.4178
56	0.0629	0.1106	0.227	0.4454	0.4837
57	0.0805	0.1058	0.2522	0.4509	0.453
58	0.0351	0.0944	0.2408	0.4363	0.4684
59	0.0626	0.1166	0.234	0.4562	0.4749
60	0.0369	0.1059	0.2229	0.4929	0.4695
61	0.0865	0.1135	0.2507	0.4388	0.4538
62	0.0276	0.1052	0.2153	0.4835	0.5132
63	0.0548	0.0903	0.2305	0.4762	0.4333
64	0.0733	0.137	0.2009	0.4592	0.4769
65	0.0568	0.1318	0.2011	0.4546	0.4743
66	0.0661	0.1065	0.2403	0.4537	0.4368

## Sheet: Figure 4B
Time(s)	Hanks	DrKiss1-10 (1 μM)	DrKiss2-10 (1 μM)	XtKiss1b-10 (1 μM)	HsKiss1-10 (1 μM)
1	0	0	0	0	0
2	0.0048	0.049	0.023	0.0186	0.0138
3	-0.0012	0.0564	0.0127	0.0308	0.0068
4	0.0158	0.0957	0.0307	0.01	0.0113
5	0.0154	0.0469	0.0362	0.0249	0.0059
6	0.0079	0.0638	0.0637	0.0365	0.0281
7	0.0118	0.0405	0.0547	0.0708	-0.0089
8	-0.0006	0.085	0.075	0.053	0.0322
9	-0.0068	0.0892	0.1031	0.0483	0.0313
10	0.0484	0.2094	0.172	0.2363	0.0934
11	0.0551	0.2024	0.1754	0.256	0.0961
12	0.0495	0.2075	0.2071	0.2672	0.1038
13	0.0356	0.2033	0.1794	0.2425	0.0877
14	0.05	0.2083	0.2248	0.2559	0.1009
15	0.0497	0.2561	0.217	0.2726	0.1145
16	0.054	0.2016	0.2425	0.2642	0.0898
17	0.0266	0.2097	0.2247	0.2787	0.09
18	0.0449	0.1975	0.2513	0.3107	0.1276
19	0.0414	0.2605	0.1893	0.2484	0.1093
20	0.0438	0.2485	0.305	0.2659	0.1215
21	0.0355	0.2302	0.218	0.2804	0.1228
22	0.039	0.234	0.2102	0.3147	0.138
23	0.0484	0.231	0.2888	0.2955	0.1538
24	0.025	0.2892	0.2521	0.2926	0.1454
25	0.0257	0.2957	0.2414	0.302	0.1296
26	0.0326	0.2734	0.2733	0.2964	0.1654
27	0.0376	0.2818	0.2699	0.3002	0.144
28	0.0387	0.291	0.2417	0.2939	0.1701
29	0.0174	0.308	0.1914	0.3425	0.2091
30	0.06	0.2864	0.2638	0.3218	0.1731
31	0.0379	0.3071	0.3	0.3449	0.1812
32	0.0232	0.3442	0.2314	0.3435	0.1963
33	0.0448	0.3108	0.2549	0.3122	0.2234
34	0.0277	0.3534	0.2669	0.3063	0.1961
35	0.021	0.3	0.2455	0.3387	0.2065
36	0.0271	0.3323	0.2484	0.3531	0.2028
37	0.0514	0.3432	0.2185	0.3303	0.232
38	0.0483	0.3439	0.2603	0.3747	0.2378
39	0.055	0.3378	0.3006	0.3564	0.2441
40	0.0313	0.3579	0.2936	0.3476	0.2369
41	0.0583	0.3682	0.2549	0.3539	0.2547
42	0.0483	0.3602	0.2345	0.362	0.2405
43	0.0538	0.4016	0.2537	0.3522	0.2664
44	0.05	0.369	0.2935	0.3527	0.2652
45	0.0621	0.4323	0.286	0.3842	0.2635
46	0.0368	0.3573	0.2519	0.3429	0.2848
47	0.0485	0.3756	0.2923	0.3503	0.2654
48	0.0524	0.3632	0.2733	0.3563	0.2811
49	0.0474	0.3988	0.2772	0.3752	0.2911
50	0.0629	0.3976	0.2999	0.3784	0.2687
51	0.0321	0.3443	0.3109	0.3746	0.2709
52	0.0447	0.3769	0.2058	0.3563	0.2716
53	0.03	0.4118	0.2999	0.3711	0.2654
54	0.0439	0.3941	0.2585	0.3991	0.263
55	0.0287	0.3594	0.2756	0.3888	0.2778
56	0.0705	0.3848	0.2512	0.3857	0.2752
57	0.0882	0.3905	0.2413	0.3919	0.2818
58	0.0481	0.4385	0.2671	0.3623	0.3034
59	0.0489	0.3777	0.2717	0.3827	0.2678
60	0.037	0.3922	0.2755	0.3958	0.2879
61	0.0371	0.3813	0.261	0.3891	0.2526
62	0.0175	0.3901	0.2549	0.4121	0.3214
63	0.054	0.4036	0.2754	0.3574	0.3168
64	0.0277	0.413	0.2457	0.4091	0.2961
65	0.0332	0.4213	0.2672	0.3909	0.2568
66	0.0465	0.3999	0.2532	0.4097	0.2658

## Sheet: Figure 4C
Time(s)	Hanks	AjKiss1b (1 μM)	HsNPS (10 nM)	HsNPS (100 nM)	HsNPS (1 μM)
1	0	0	0	0	0
2	-0.0098	0.0387	0.0121	0.0008	-0.02
3	-0.0111	0.0399	0.0241	-0.0084	0.0002
4	-0.014	0.0419	0.0103	0.005	0.0052
5	0.0176	0.0367	0.028	-0.005	-0.0058
6	0.0164	0.0429	0.0238	-0.0305	0.0117
7	-0.0008	0.0362	0.0185	0.0048	-0.0118
8	0.0137	0.0485	0.0314	0.0092	0.0116
9	0.0043	0.1084	0.0393	-0.0166	0.0072
10	0.0022	0.1349	0.0336	0.0058	0.0625
11	-0.014	0.1372	0.0427	0.0257	0.0669
12	-0.0202	0.1584	0.0135	-0.0047	0.0831
13	-0.0105	0.1943	0.0243	0.0049	0.0728
14	0.0037	0.163	0.0323	-0.0009	0.0956
15	0.0059	0.1744	0.0399	-0.0076	0.0686
16	0.0082	0.2092	0.0395	-0.0028	0.0694
17	-0.0129	0.1953	0.0443	0.0134	0.0572
18	-0.005	0.1963	0.0144	0.0035	0.0641
19	0.0105	0.1868	0.0207	0.0081	0.054
20	0.0167	0.203	0.0501	0.019	0.0522
21	-0.0003	0.2192	0.0256	0.0296	0.0572
22	0.0124	0.2082	0.0389	0.0119	0.0405
23	-0.0034	0.2046	0.0405	0.0188	0.081
24	0.0193	0.2064	0.0622	0.0139	0.0574
25	0.0108	0.2389	0.0355	0.0179	0.0936
26	0.0089	0.1815	0.0676	-0.0017	0.0552
27	-0.0055	0.2059	0.0426	0.0164	0.0784
28	-0.0252	0.2009	0.0459	-0.0211	0.067
29	-0.0172	0.205	0.0553	0.0188	0.0836
30	0.012	0.2161	0.0387	0.0084	0.0972
31	0.0328	0.1886	0.0464	0.0295	0.0461
32	-0.0062	0.2114	0.0448	0.0001	0.074
33	0.0033	0.2464	0.0479	-0.02	0.0584
34	-0.0027	0.212	0.0538	-0.01	0.0834
35	0.0131	0.2203	0.0326	-0.0195	0.0479
36	0.0025	0.2055	0.0464	0.0107	0.0675
37	0.0046	0.2344	0.0395	0.0075	0.0414
38	0.0108	0.2184	0.0126	-0.0191	0.0556
39	0.0219	0.209	0.0151	-0.0098	0.0834
40	0.0081	0.2176	0.0384	0.0199	0.0565
41	0.004	0.2116	0.0571	-0.0167	0.0499
42	0.0166	0.1971	0.0964	-0.0282	0.0565
43	0	0.2227	0.0548	0.016	0.0414
44	0.0223	0.2241	0.0583	0.0231	0.0557
45	-0.0059	0.2223	0.0286	-0.0037	0.0458
46	0.0022	0.2384	0.0539	0.0044	0.0683
47	-0.0167	0.2376	0.0377	0.0104	0.0707
48	0.0081	0.2162	0.0533	0.0047	0.0912
49	-0.0145	0.2475	0.048	0.0199	0.0549
50	-0.0074	0.2255	0.0676	-0.0156	0.0608
51	0.0075	0.2205	0.0637	-0.0296	0.051
52	0.006	0.2566	0.0633	0.029	0.0285
53	-0.0151	0.2296	0.0247	-0.0178	0.0544
54	-0.0045	0.2216	0.0527	0.0009	0.1018
55	0.0044	0.2199	0.0361	0.0342	0.0086
56	-0.0184	0.223	0.0557	-0.0109	0.0343
57	0.0001	0.2194	0.0531	0.0261	0.0193
58	0.0053	0.2392	0.0587	-0.0091	0.0554
59	-0.014	0.2187	0.0432	-0.0042	0.0369
60	-0.0145	0.2454	0.0742	0.0272	0.0361
61	-0.0231	0.2436	0.0594	0.0109	0.0777
62	0.0104	0.2108	0.0335	0.0085	0.022
63	0.0072	0.2287	0.0464	0.0121	0.11
64	0.0116	0.2297	0.036	0.0306	0.0396
65	0.0183	0.2273	0.0486	0.0217	0.0903
66	0.0351	0.2265	0.0559	0.0174	0.0293

## Sheet: Figure 4D
Time(s)	Hanks	AjKiss1a (1 μM)	HsNPS (10 nM)	HsNPS (100 nM)	HsNPS (1 μM)
1	0	0	0	0	0
2	0.0283	0.0651	0.0115	-0.0209	0.0377
3	0.0389	0.0384	0.016	-0.0193	-0.0129
4	0.0406	0.1021	0.0329	-0.0374	-0.03
5	0.047	0.0422	0.04	-0.0317	-0.005
6	0.02	0.0506	-0.0426	0.0204	0.0068
7	0.0541	0.0538	-0.0059	-0.019	-0.0365
8	0.0533	0.0663	0.015	-0.0056	0.0202
9	0.0505	0.0681	0.0458	-0.0398	0.0132
10	0.0418	0.2475	0.0354	0.0207	0.1327
11	0.0376	0.2574	0.0087	-0.0117	0.0695
12	0.0601	0.2682	0.0358	0.0106	0.0716
13	0.0405	0.2461	0.0899	-0.0075	0.0443
14	0.0566	0.2707	0.0541	0.0063	0.0581
15	0.0781	0.262	0.0802	-0.0399	0.0866
16	0.0852	0.2386	0.001	0.048	0.1262
17	0.0735	0.3057	0.0646	0.0168	0.0587
18	0.0288	0.333	0.0159	0.0012	0.0654
19	0.0635	0.306	0.0558	0.0103	0.0885
20	0.0621	0.3271	0.068	0.0379	0.0554
21	0.0752	0.2754	0.0738	0.0173	0.0601
22	0.0912	0.3373	0.0414	-0.0118	0.0588
23	0.0585	0.3344	0.0562	0.0219	0.0688
24	0.0562	0.308	0.0202	-0.0063	0.0229
25	0.0185	0.2948	-0.0046	-0.0405	0.0673
26	0.1187	0.3351	0.0691	-0.004	0.1011
27	0.0218	0.3459	0.0334	-0.0183	0.0545
28	0.1002	0.3615	0.0517	-0.0079	0.0631
29	0.0849	0.3262	0.031	-0.001	0.0487
30	0.0622	0.369	0.075	-0.0271	0.0099
31	0.0452	0.3827	0.0593	-0.0125	-0.0187
32	0.0555	0.3436	0.0738	0.017	0.0837
33	0.0572	0.4098	0.0326	0.0158	0.113
34	0.0926	0.3254	0	0.0409	0.0756
35	0.0642	0.3504	0.0735	0.0729	0.0548
36	0.0702	0.3839	0.0772	0.0411	-0.0048
37	0.0819	0.4191	0.0707	0.0268	0.0309
38	0.1113	0.3907	0.0511	0.0592	0.044
39	0.1055	0.3245	0.0417	0.0249	0.0346
40	0.0595	0.3584	0.0355	0.0303	0.0155
41	0.0736	0.3542	0.0736	-0.0077	0.0224
42	0.0414	0.3443	0.0085	0.0577	-0.0193
43	0.0748	0.4296	0.0539	0.032	0.082
44	0.0517	0.4035	0.0828	0.0019	-0.0005
45	0.0873	0.3939	0.0487	0.0291	0.0803
46	0.0919	0.3808	0.0292	0.0436	0.121
47	0.0662	0.3989	0.0642	-0.0009	0.0432
48	0.0471	0.3843	0.0456	0.0627	0.1017
49	0.1057	0.352	0.0638	0.0072	0.0689
50	0.0708	0.408	0.0192	0.0372	0.0859
51	0.0935	0.4451	0.0763	0.0267	0.056
52	0.039	0.383	0.0587	0.0179	0.0179
53	0.0618	0.4121	0.0915	0.0657	0.0196
54	0.1225	0.3948	0.0558	-0.049	0.0317
55	0.085	0.4503	0.0657	-0.0062	0.0486
56	0.1303	0.4392	0.0565	-0.049	0.06
57	0.0979	0.4126	0.038	0.0062	0.0341
58	0.1077	0.395	0.0435	-0.0049	0.0935
59	0.0874	0.3376	0.0457	0.0424	0.1385
60	0.1001	0.3679	0.0603	0.0501	0.0896
61	0.0515	0.4474	0.0443	0.0028	0.099
62	0.0612	0.3478	0.0422	0.0676	0.1099
63	0.0809	0.4136	0.0426	0.0572	0.0884
64	0.0413	0.4281	0.0106	0.0155	0.0228
65	0.0799	0.4643	0.0767	0.0053	0.1444
66	0.0587	0.4088	0.0684	0.0857	0.1446

## Sheet: Figure 4E
Time(s)	Hanks	HsKiss1-10 (1 μM)	AjKiss1b (1 μM)	AjKiss1a (1 μM)
1	0	0	0	0
2	0.0174	0.0444	0.0253	0.0214
3	-0.0059	0.0428	0.0336	0.0628
4	0.0126	0.0657	0.0018	0.0319
5	0.0276	0.0417	0.0305	0.097
6	0.0077	0.0092	0.092	0.0121
7	0.0058	0.0034	0.0271	0.0413
8	0.0036	0.0327	0.0298	0.0145
9	0.0151	0.2647	0.1616	0.1468
10	0.0153	0.2617	0.1464	0.1692
11	-0.0111	0.292	0.1049	0.1709
12	-0.0059	0.2665	0.1091	0.121
13	0.0036	0.2931	0.1126	0.1306
14	0.0068	0.2799	0.1138	0.161
15	-0.0059	0.2855	0.0891	0.1767
16	0.0033	0.254	0.1239	0.1377
17	0.0053	0.2581	0.1086	0.1488
18	-0.0042	0.2977	0.0953	0.1621
19	0.0186	0.2422	0.1147	0.1376
20	0.0292	0.2509	0.1114	0.1642
21	0.006	0.2673	0.1399	0.1268
22	-0.0013	0.2796	0.1245	0.176
23	0.0043	0.2908	0.1122	0.1778
24	0.0005	0.2743	0.1114	0.145
25	0.0139	0.2827	0.1161	0.1636
26	0.0176	0.2479	0.082	0.1256
27	-0.0042	0.2975	0.0956	0.1379
28	0.0133	0.2504	0.1416	0.1469
29	0.0157	0.2522	0.123	0.1794
30	0.0063	0.3021	0.1195	0.1508
31	0.0152	0.3056	0.132	0.1623
32	0.003	0.2675	0.148	0.1515
33	0.0055	0.2825	0.1056	0.1658
34	0.0054	0.2745	0.1459	0.1694
35	-0.0027	0.2882	0.1457	0.1398
36	0.0231	0.2743	0.1543	0.176
37	0.0171	0.3026	0.1124	0.1701
38	0.0158	0.2643	0.1297	0.1978
39	0.0149	0.274	0.1047	0.1973
40	0.0102	0.2736	0.1376	0.1914
41	0.0014	0.2427	0.1068	0.1404
42	-0.0135	0.2591	0.1035	0.1829
43	0.0033	0.2508	0.1228	0.1911
44	0.0024	0.2892	0.1486	0.1823
45	0.018	0.2992	0.1052	0.2072
46	0.01	0.2561	0.0915	0.2191
47	-0.0136	0.251	0.1457	0.2031
48	-0.0029	0.3103	0.1189	0.2006
49	0.0199	0.3027	0.1484	0.2191
50	0.0326	0.2503	0.1188	0.1976
51	0.0165	0.3036	0.1167	0.1903
52	0.0264	0.3039	0.1384	0.2081
53	0.0144	0.2829	0.1275	0.2228
54	0.0065	0.275	0.1353	0.1913
55	0.0167	0.2569	0.1215	0.2021
56	0.0043	0.2783	0.1673	0.2106
57	0.0194	0.2806	0.1335	0.1982
58	0.0167	0.3143	0.1451	0.1892
59	0.0078	0.2711	0.1427	0.2249
60	0.0106	0.3133	0.1681	0.1985
61	0.0154	0.3229	0.1463	0.2119
62	0.0069	0.273	0.1678	0.2112
63	0.0146	0.3036	0.139	0.1918
64	0.0155	0.3023	0.1348	0.2098
65	0.0073	0.3384	0.179	0.199
66	0.0367	0.3459	0.1633	0.1915

## Sheet: Figure 4F
Time(s)	Hanks	DrKiss2-10 (1 μM)	DrKiss1-10 (1 μM)	AjKiss1b (1 μM)	AjKiss1a (1 μM)
1	0	0	0	0	0
2	0.0104	0.0175	-0.0188	0.027	0.0173
3	-0.0035	-0.0091	-0.0053	0.0287	0.0109
4	0.0146	0.0073	0.0284	0.0279	0.012
5	-0.0251	0.0091	0.0653	0.0122	0.0283
6	0.0073	0.0119	0.0153	0.0538	0.0213
7	0.0059	0.0494	0.0382	0.0505	0.0311
8	0.0171	0.0539	0.0061	0.0031	0.0501
9	0.0125	0.168	0.2602	0.0862	0.1097
10	0.0244	0.198	0.2939	0.0801	0.2806
11	0.0179	0.1578	0.2499	0.0994	0.3014
12	0.0066	0.15	0.2305	0.1127	0.274
13	0.0141	0.1611	0.2804	0.0973	0.2601
14	0.0257	0.2019	0.2696	0.1129	0.2511
15	0.0256	0.2187	0.2615	0.1216	0.2966
16	0.0138	0.1784	0.2839	0.1225	0.3035
17	0.002	0.1614	0.2862	0.1333	0.3046
18	0.0105	0.1637	0.2807	0.1197	0.2502
19	0.0341	0.2095	0.2511	0.1291	0.2311
20	0.0143	0.1749	0.2421	0.1273	0.2828
21	0.0101	0.1778	0.2451	0.096	0.2531
22	0.0255	0.2165	0.3187	0.0821	0.3017
23	0.0252	0.2323	0.2763	0.1026	0.2681
24	0.0181	0.2051	0.3046	0.1167	0.3292
25	0.0111	0.1689	0.2509	0.1228	0.2898
26	0.0299	0.2101	0.2611	0.1154	0.2724
27	0.0129	0.2141	0.3117	0.1115	0.3209
28	0.0357	0.1881	0.2982	0.0914	0.261
29	0.0191	0.183	0.2651	0.1123	0.2923
30	0.0266	0.201	0.3137	0.0797	0.3062
31	0.0213	0.2333	0.2811	0.1176	0.325
32	0.0162	0.225	0.2734	0.1376	0.2992
33	0.0311	0.191	0.2939	0.1269	0.2907
34	0.0212	0.2327	0.3013	0.1472	0.2608
35	0.0147	0.1995	0.3261	0.1437	0.3221
36	0.0132	0.2326	0.3376	0.0906	0.2629
37	0.0375	0.2192	0.3019	0.1175	0.2528
38	0.028	0.2426	0.3148	0.0989	0.3261
39	0.0118	0.2372	0.2953	0.1076	0.2828
40	0.0394	0.2513	0.3301	0.1286	0.3008
41	0.0294	0.2086	0.341	0.1218	0.2828
42	0.0219	0.2495	0.2984	0.1185	0.2728
43	0.0011	0.2488	0.2893	0.1351	0.3314
44	0.0137	0.2157	0.2885	0.1194	0.323
45	0.0489	0.2325	0.3062	0.14	0.3396
46	0.0294	0.1932	0.2645	0.1114	0.2947
47	0.0353	0.2487	0.2862	0.1367	0.3238
48	0.0475	0.2432	0.3197	0.1374	0.3225
49	0.0131	0.2121	0.3325	0.0902	0.2829
50	0.0121	0.2627	0.327	0.1286	0.2768
51	0.0137	0.2584	0.3235	0.1031	0.3278
52	0.0367	0.2299	0.3436	0.1096	0.2961
53	0.0132	0.2637	0.3225	0.1375	0.2652
54	0.0393	0.2586	0.3678	0.143	0.2844
55	0.0261	0.2477	0.3262	0.1355	0.2741
56	0.0113	0.2564	0.3246	0.1124	0.3252
57	0.0129	0.2389	0.3469	0.1568	0.3222
58	0.0288	0.2603	0.349	0.1081	0.2738
59	0.0125	0.2287	0.3657	0.0964	0.2826
60	0.0257	0.1994	0.3033	0.1124	0.3232
61	0.014	0.2536	0.3132	0.1119	0.3223
62	0.047	0.282	0.3532	0.1131	0.3221
63	0.0358	0.2705	0.314	0.1698	0.2829
64	0.0106	0.229	0.3029	0.1826	0.3005
65	0.0107	0.2595	0.3336	0.1122	0.2943
66	0.0312	0.2727	0.3279	0.1598	0.3288

## Sheet: Figure 4G
Time(s)	Hanks	DrKiss2-10 (1 μM)	DrKiss1-10 (1 μM)	AjKiss1b (1 μM)	AjKiss1a (1 μM)
1	0	0	0	0	0
2	-0.0171	0.0322	0.0269	0.0141	-0.0104
3	-0.0141	0.0196	0.0404	0.0261	0.0269
4	0.0313	0.0112	0.0513	0.0027	0.0085
5	0.0306	0.0394	0.0178	0.0275	0.0361
6	0.0633	0.0556	0.0362	0.0178	0.0146
7	0.0336	0.0084	0.0474	0.0405	0.0627
8	0.0493	0.0198	0.0286	0.0206	0.0185
9	0.0284	0.2404	0.2785	0.1188	0.1971
10	0.0409	0.202	0.3046	0.102	0.1883
11	0.0165	0.2316	0.3011	0.1063	0.1571
12	0.0035	0.2141	0.2701	0.086	0.2053
13	0.0148	0.1846	0.2647	0.1359	0.2355
14	0.0091	0.2239	0.3115	0.1168	0.2028
15	0.0114	0.2193	0.3246	0.0907	0.1904
16	0.0139	0.2391	0.2939	0.0995	0.2409
17	0.0313	0.2494	0.2746	0.1384	0.1834
18	0.0299	0.2126	0.3001	0.1433	0.2307
19	0.0324	0.1853	0.2742	0.1372	0.2104
20	0.0107	0.202	0.3107	0.1681	0.1828
21	0.0247	0.2536	0.2914	0.1483	0.2175
22	0.0174	0.2476	0.319	0.1602	0.179
23	0.003	0.2064	0.2864	0.1312	0.2029
24	0.0453	0.2524	0.2819	0.1605	0.182
25	0.0193	0.2013	0.2666	0.1309	0.1844
26	0.0109	0.2657	0.2749	0.1062	0.2229
27	0.0083	0.2062	0.3136	0.1741	0.2229
28	0.036	0.2483	0.3204	0.1368	0.1907
29	0.0046	0.2081	0.3382	0.1444	0.198
30	0.027	0.2452	0.2975	0.1369	0.2333
31	0.0134	0.2655	0.2762	0.164	0.1984
32	0.0179	0.2368	0.3179	0.1445	0.1804
33	0.0171	0.2258	0.2663	0.1534	0.2202
34	0.0195	0.2517	0.3041	0.149	0.2402
35	0.0143	0.2295	0.3229	0.1236	0.2126
36	0.0232	0.2064	0.3013	0.1451	0.1961
37	0.0485	0.25	0.2879	0.1353	0.2224
38	0.0141	0.2746	0.3344	0.134	0.2422
39	0.0367	0.2306	0.2959	0.1752	0.1998
40	0.0267	0.2168	0.3447	0.1324	0.2523
41	0.031	0.2489	0.3448	0.1619	0.2139
42	0.0121	0.2599	0.3055	0.1755	0.2238
43	0.0248	0.2539	0.3235	0.1686	0.2641
44	0.0212	0.2024	0.3164	0.1368	0.201
45	0.0178	0.2166	0.307	0.1534	0.253
46	0.0359	0.2137	0.3092	0.1758	0.2729
47	0.0113	0.2307	0.3233	0.1761	0.2133
48	0.0069	0.2008	0.2733	0.1373	0.2329
49	0.0246	0.2422	0.3384	0.1597	0.271
50	0.0361	0.2371	0.3366	0.1736	0.2528
51	0.0138	0.2266	0.3028	0.1926	0.2636
52	0.0252	0.2441	0.347	0.1446	0.2315
53	0.0219	0.2243	0.2753	0.184	0.2327
54	0.0145	0.2015	0.3222	0.1871	0.2659
55	0.0612	0.2534	0.307	0.1659	0.2232
56	0.0025	0.222	0.2755	0.2002	0.2582
57	0.02	0.2719	0.3259	0.1658	0.2314
58	0.0317	0.2211	0.3409	0.1994	0.2645
59	0.0489	0.2618	0.3395	0.2039	0.2649
60	0.0095	0.2339	0.3325	0.1468	0.241
61	0.0163	0.2669	0.2916	0.1661	0.231
62	0.0472	0.2211	0.3595	0.2135	0.2652
63	0.0179	0.2637	0.3489	0.1933	0.2773
64	0.0569	0.2773	0.3665	0.2124	0.2529
65	0.0069	0.2152	0.3328	0.1836	0.2233
66	0.0667	0.2424	0.3554	0.2473	0.2529
