# Supplementary material for: Existence and functions of a kisspeptin neuropeptide signaling system in a non-chordate deuterostome species
Source: eLife. 2020 Jun 9;9:e53370. doi: 10.7554/eLife.53370 (PMC7282810; doi:10.7554/eLife.53370)
Supplement: Figure 5—source data 1. [file elife-53370-fig5-data1.xlsx]

## Sheet: Figure 5A1-AjkissR1
Time(s)	Hanks	Ajkiss1a/ DMSO	Ajkiss1a/ PTX	Ajkiss1a/ U73122	Ajkiss1a/ BAPTA-AM	Ajkiss1a/ EGTA	Ajkiss1a/ FR900359
1	0	0	0	0	0	0	0
2	0	0.023	0.0382	-0.0008	0.0155	0.0043	0.0048
3	0.0014	0.0452	0.0609	0.0159	-0.0006	-0.0026	0.0099
4	0.0291	0.0314	0.0492	0.0293	0.0179	0.0004	0.0182
5	0.0113	0.0379	0.051	0.0065	0.0128	0.0015	0.0198
6	-0.0011	0.0212	0.0629	0.0444	0.0111	0.0038	0.0118
7	-0.0099	0.0307	0.0935	-0.009	0.0061	0.03	0.0038
8	0.0083	0.0468	0.0754	0.0144	0.0425	0.0295	0.0015
9	0.0013	0.0489	0.0598	0.0272	0.0367	0.0391	0.0068
10	0.0074	0.1812	0.2592	0.1272	0.0873	0.0229	0.0168
11	-0.0066	0.2218	0.2436	0.1059	0.0922	0.0416	0.0138
12	0.0051	0.1785	0.2253	0.1212	0.0955	0.0558	0.034
13	0.0042	0.1999	0.2216	0.1201	0.0759	0.0429	0.0212
14	0.0064	0.1841	0.2197	0.1203	0.0727	0.0403	0.0152
15	-0.001	0.1859	0.2301	0.1303	0.1075	0.031	0.039
16	0.0051	0.1945	0.2065	0.0976	0.0898	0.0581	0.0303
17	-0.0062	0.1885	0.2443	0.102	0.094	0.0459	0.0329
18	0.0099	0.173	0.2457	0.1364	0.0996	0.0512	0.0236
19	0.0088	0.1751	0.2395	0.1182	0.0768	0.0432	0.0185
20	-0.0096	0.2025	0.2505	0.087	0.0812	0.0552	0.0268
21	0.008	0.1935	0.2357	0.1156	0.1092	0.0457	0.0277
22	-0.0114	0.2338	0.2559	0.1118	0.089	0.0445	0.0057
23	0.0043	0.2149	0.2744	0.1391	0.0756	0.0133	0.035
24	0.0002	0.21	0.2348	0.119	0.0565	0.0548	0.0399
25	0.0122	0.247	0.2456	0.1233	0.0774	0.0389	0.0371
26	-0.017	0.2309	0.236	0.1206	0.0633	0.041	0.0265
27	-0.0164	0.2071	0.2524	0.1109	0.0822	0.0743	0.0317
28	-0.0144	0.2145	0.2392	0.1236	0.0995	0.0458	0.0222
29	-0.006	0.2277	0.2682	0.1322	0.0954	0.0497	0.0258
30	-0.0109	0.2134	0.2678	0.1291	0.0746	0.036	0.0123
31	-0.0197	0.1964	0.2227	0.1289	0.0936	0.0422	0.0381
32	0.007	0.2102	0.2604	0.1297	0.0851	0.0507	0.0242
33	-0.0089	0.179	0.2181	0.1166	0.0677	0.0314	0.025
34	-0.0169	0.1964	0.2468	0.1119	0.1085	0.0392	0.0282
35	-0.0133	0.2068	0.2678	0.1147	0.1016	0.0298	0.0217
36	0.0036	0.222	0.2381	0.1249	0.0698	0.0357	0.0392
37	-0.0262	0.235	0.2361	0.1379	0.0846	0.0444	0.027
38	0.0002	0.2237	0.2238	0.1204	0.0929	0.0354	0.0305
39	0.0104	0.2344	0.2506	0.0907	0.0857	0.0506	0.0265
40	-0.0079	0.2482	0.2756	0.1189	0.0851	0.0308	0.0457
41	-0.0047	0.2431	0.2409	0.1288	0.0973	0.0476	0.0394
42	-0.0187	0.2366	0.2402	0.1256	0.0765	0.0696	0.0361
43	0.011	0.2421	0.2415	0.1173	0.0772	0.0365	0.0345
44	0.007	0.2214	0.2648	0.1226	0.1031	0.0443	0.0135
45	-0.014	0.2516	0.2392	0.1335	0.0804	0.0524	0.0403
46	-0.0021	0.2428	0.2575	0.1314	0.081	0.053	0.0225
47	-0.0082	0.2323	0.2567	0.1243	0.0977	0.0377	0.0389
48	-0.0304	0.252	0.2436	0.1086	0.1151	0.0526	0.0537
49	0.0033	0.2233	0.3051	0.1332	0.1029	0.0395	0.0263
50	-0.0001	0.2382	0.2683	0.137	0.107	0.0356	0.0555
51	-0.0118	0.2237	0.2753	0.1203	0.0617	0.0534	0.0472
52	-0.0089	0.2457	0.3096	0.1349	0.1066	0.0523	0.0558
53	-0.0142	0.2192	0.2843	0.1192	0.0789	0.0442	0.0302
54	-0.0063	0.2451	0.3061	0.1562	0.0791	0.0496	0.0486
55	-0.0341	0.2329	0.2632	0.1382	0.0632	0.0443	0.044
56	0.0021	0.2388	0.2763	0.115	0.0992	0.0294	0.0629
57	0.0007	0.228	0.2562	0.1274	0.0793	0.0546	0.0425
58	-0.008	0.2418	0.3149	0.137	0.0962	0.05	0.036
59	-0.0109	0.2229	0.271	0.1473	0.0801	0.0231	0.0486
60	0.0007	0.2308	0.2546	0.1264	0.0991	0.05	0.0336
61	-0.0175	0.2267	0.2955	0.1573	0.0874	0.0596	0.0307
62	-0.01	0.2418	0.2763	0.1152	0.1029	0.0356	0.0437
63	-0.0111	0.2409	0.2867	0.1365	0.045	0.0195	0.0484
64	-0.0081	0.2316	0.2515	0.1248	0.1048	0.0387	0.0361
65	0.0127	0.2594	0.2893	0.1366	0.0665	0.0385	0.0276
66	-0.0103	0.2631	0.2665	0.1569	0.0756	0.0203	0.0461
67	0.0072	0.2795	0.252	0.1154	0.088	0.0428	0.0481
68	-0.0079	0.278	0.3194	0.1595	0.0911	0.0449	0.0589

## Sheet: Figure 5A2-AjkissR2
Time(s)	Hanks	Ajkiss1a/ DMSO	Ajkiss1a/ PTX	Ajkiss1a/ U73122	Ajkiss1a/ BAPTA-AM	Ajkiss1a/ EGTA	Ajkiss1a/ FR900359
1	0	0	0	0	0	0	0
2	-0.0139	-0.0149	0.0602	-0.002	-0.0074	0.0528	0.0006
3	0.0011	0.0105	0.0577	-0.0006	-0.0079	0.0203	0.0033
4	-0.0061	0.0233	0.0367	-0.0215	0.0031	0.0116	-0.0073
5	-0.0008	0.0094	0.0498	-0.026	-0.0234	0.0119	0.0249
6	0.0183	0.0178	0.0502	0.0342	-0.0074	0.0113	0.025
7	-0.0563	0.0459	0.0479	-0.0062	0.0046	0.0374	0.0258
8	0.0328	0.0306	0.0751	0.0086	0.0046	0.0568	0.0204
9	0.0104	0.0631	0.053	0.0054	0.0015	0.0438	0.0197
10	0.0013	0.3004	0.3271	0.1883	0.0737	0.1246	0.0379
11	0.0002	0.3026	0.3521	0.1778	0.0784	0.1136	0.049
12	0.0009	0.3062	0.317	0.2098	0.106	0.106	0.0497
13	-0.0033	0.3153	0.3361	0.1891	0.091	0.0988	0.0724
14	0.0275	0.3112	0.3062	0.1996	0.0756	0.1375	0.0156
15	0.001	0.295	0.3185	0.2033	0.0892	0.1088	0.029
16	0.0443	0.3436	0.3667	0.1948	0.0637	0.1349	0.0643
17	0.0021	0.32	0.3227	0.1856	0.0934	0.1395	0.0512
18	0.0051	0.296	0.34	0.1901	0.1212	0.1079	0.0707
19	0.0148	0.3333	0.3722	0.196	0.1073	0.1017	0.039
20	0.0141	0.3009	0.3467	0.2193	0.0893	0.1249	0.0401
21	-0.0022	0.3034	0.3196	0.1946	0.1081	0.1064	0.0767
22	0.0029	0.3077	0.3167	0.2017	0.1002	0.1307	0.0474
23	-0.0211	0.3234	0.3583	0.202	0.109	0.13	0.061
24	0.0067	0.3404	0.3174	0.2106	0.1205	0.1147	0.0504
25	-0.0161	0.3534	0.3459	0.2443	0.1189	0.12	0.0779
26	0.0034	0.2932	0.3618	0.2501	0.1238	0.124	0.0627
27	0.0083	0.3166	0.3242	0.2269	0.1012	0.1309	0.0579
28	-0.0468	0.338	0.4075	0.2242	0.1254	0.1212	0.0406
29	-0.0051	0.3335	0.362	0.2294	0.1303	0.1403	0.0358
30	0.0091	0.3378	0.3972	0.2422	0.1258	0.1499	0.0378
31	0.0308	0.3848	0.4076	0.1965	0.132	0.1316	0.0548
32	-0.0155	0.3621	0.3657	0.2336	0.1619	0.1131	0.0276
33	0.0061	0.354	0.3775	0.2537	0.148	0.1407	0.0595
34	-0.0246	0.3682	0.411	0.2149	0.1506	0.1387	0.0639
35	-0.0098	0.3929	0.3696	0.2234	0.1512	0.1137	0.0343
36	-0.039	0.3758	0.3858	0.2435	0.1379	0.1144	0.0363
37	-0.0081	0.3934	0.3868	0.2383	0.1555	0.1349	0.0574
38	-0.0215	0.3892	0.3876	0.2165	0.1603	0.1327	0.0412
39	-0.0341	0.3876	0.3618	0.231	0.1728	0.1189	0.0658
40	-0.0062	0.3532	0.3745	0.2276	0.1769	0.1357	0.0368
41	-0.0159	0.3942	0.3892	0.2455	0.1542	0.1466	0.015
42	-0.0344	0.3959	0.4053	0.2482	0.1727	0.148	0.0489
43	-0.029	0.3868	0.4077	0.2172	0.1334	0.1438	0.0539
44	0.0303	0.4094	0.3839	0.2631	0.1595	0.1361	0.0491
45	0.0045	0.3939	0.4068	0.266	0.1827	0.177	0.069
46	0.003	0.4235	0.3842	0.2595	0.1779	0.1589	0.0607
47	-0.0199	0.4318	0.4229	0.2493	0.1714	0.1592	0.0189
48	-0.027	0.3866	0.3864	0.2517	0.1438	0.1217	0.0646
49	-0.0178	0.3981	0.4482	0.2653	0.1565	0.1261	0.0549
50	-0.0018	0.4247	0.4312	0.2408	0.1592	0.1455	0.0098
51	-0.0143	0.3971	0.4131	0.2661	0.1709	0.1517	0.0472
52	-0.0222	0.3845	0.4174	0.2774	0.1598	0.1361	0.0779
53	0.0191	0.4345	0.4474	0.2576	0.1903	0.1581	0.0773
54	0.0213	0.4275	0.4384	0.2793	0.1547	0.1403	0.0678
55	-0.0107	0.4245	0.4461	0.2748	0.1457	0.1557	0.0846
56	0.0012	0.3743	0.4326	0.2598	0.1613	0.153	0.0164
57	0.0163	0.4058	0.4046	0.2788	0.1534	0.1338	0.037
58	-0.0211	0.3999	0.44	0.243	0.1742	0.1568	0.078
59	-0.0019	0.4227	0.4265	0.2545	0.187	0.1252	0.0225
60	-0.0321	0.4094	0.4157	0.2757	0.1997	0.1515	0.0729
61	0.0281	0.4234	0.4286	0.2527	0.1624	0.128	0.0444
62	-0.0161	0.4284	0.4517	0.2841	0.17	0.1403	0.0686
63	-0.0288	0.438	0.4699	0.2315	0.1891	0.1468	0.0088
64	-0.0241	0.4514	0.4599	0.261	0.195	0.1764	0.0701
65	-0.0282	0.4224	0.4403	0.2904	0.18	0.1374	0.0473
66	0.0099	0.3812	0.4479	0.2723	0.1966	0.2053	0.0424
67	-0.0384	0.4018	0.4356	0.2884	0.1644	0.1898	0.0192
68	-0.029	0.4351	0.4297	0.2657	0.1978	0.1718	0.0394

## Sheet: Figure 5A3-AjKissR1
Time(s)	Hanks	Ajkiss1b/ DMSO	Ajkiss1b/ PTX	Ajkiss1b/ U73122	Ajkiss1b/ BAPTA-AM	Ajkiss1b/ EGTA	Ajkiss1b/ FR900359
1	0	0	0	0	0	0	0
2	-0.0087	0.0308	0.023	-0.0081	0.0223	0.0125	0.0023
3	0.0007	0.0239	0.0058	0.0063	0.0411	0.0145	0.0048
4	0.0052	0.0543	0.0355	-0.0274	0.0236	0.0034	-0.0257
5	-0.002	0.0666	0.0338	0.0157	0.0259	0.0171	0.0084
6	-0.0014	0.0571	0.039	0.0122	0.0374	0.0499	0.0056
7	0.0083	0.056	0.0218	0.0175	0.03	0.0144	0.0037
8	0.0025	0.0761	0.0633	0.0158	0.031	0.0192	-0.0015
9	0.0086	0.0567	0.0506	0.0138	0.0395	0.01	0.0065
10	0.0214	0.2266	0.2315	0.1685	0.1153	0.0657	0.0024
11	0.0307	0.2572	0.2424	0.1614	0.0923	0.0541	0.0316
12	0.0135	0.2109	0.2515	0.1737	0.099	0.0237	0.0019
13	0.0213	0.2274	0.2678	0.1828	0.1015	0.0588	0.0182
14	0.0029	0.2333	0.2698	0.2008	0.0778	0.0399	0.016
15	0.0028	0.2104	0.2597	0.167	0.1035	0.0408	0.02
16	0.0137	0.243	0.2616	0.1397	0.0942	0.0452	-0.0024
17	0.0109	0.2387	0.2593	0.1731	0.0862	0.0604	0.0109
18	0.0165	0.2438	0.3085	0.1797	0.0883	0.06	0.0296
19	-0.0091	0.265	0.2182	0.1691	0.0927	0.0604	0.0225
20	-0.013	0.2847	0.2915	0.1556	0.1181	0.0562	0.0176
21	0.0065	0.2281	0.2735	0.1627	0.1063	0.0631	0.0137
22	0.012	0.2591	0.2827	0.1687	0.1069	0.0709	0.0353
23	-0.0096	0.2908	0.2608	0.1836	0.1084	0.0558	0.0385
24	0.0011	0.2758	0.3152	0.1448	0.1108	0.0732	0.0026
25	-0.0037	0.2975	0.2924	0.168	0.0954	0.0523	0.0081
26	0.0095	0.2462	0.264	0.152	0.1004	0.0275	0.0285
27	-0.0086	0.3144	0.2499	0.1766	0.1161	0.0376	0.0219
28	-0.01	0.2622	0.2801	0.1755	0.1155	0.0811	0.0219
29	-0.0052	0.2817	0.2738	0.1859	0.1155	0.0692	0.0203
30	0.0018	0.3089	0.2898	0.1765	0.1067	0.0724	0.0169
31	-0.013	0.2696	0.2601	0.1878	0.1032	0.0428	0.008
32	-0.006	0.2905	0.283	0.191	0.1134	0.0661	0.0246
33	0.0103	0.2911	0.2747	0.1525	0.0934	0.0719	0.0185
34	-0.0122	0.3028	0.3125	0.2065	0.1088	0.0928	0.0169
35	-0.0184	0.3018	0.2998	0.1767	0.1031	0.0685	0.0288
36	-0.0026	0.3177	0.3069	0.2209	0.1358	0.0681	0.0282
37	-0.0194	0.3009	0.2874	0.1346	0.119	0.0644	0.0408
38	-0.0006	0.2847	0.3275	0.1351	0.0832	0.0584	0.0058
39	0.0037	0.3046	0.3044	0.1689	0.1055	0.0814	0.0281
40	-0.0111	0.3086	0.2914	0.165	0.0944	0.0612	0.0186
41	-0.0001	0.3255	0.2921	0.1623	0.1041	0.0756	0.0162
42	-0.0211	0.3263	0.2804	0.1985	0.1084	0.0916	0.024
43	-0.0053	0.2929	0.3164	0.1823	0.1044	0.0807	0.0239
44	0.0106	0.3708	0.324	0.1834	0.1259	0.075	0.0351
45	-0.0199	0.3349	0.3098	0.1723	0.1244	0.0583	0.0335
46	0.0144	0.3491	0.2775	0.1758	0.1129	0.0659	0.0127
47	-0.0193	0.3392	0.2947	0.2148	0.0958	0.0536	0.0284
48	0.0546	0.3606	0.3267	0.1809	0.0976	0.0647	0.0341
49	-0.0028	0.315	0.3285	0.1874	0.1133	0.0651	0.0143
50	-0.0104	0.3616	0.318	0.1884	0.1204	0.0907	0.0046
51	-0.0087	0.3636	0.3402	0.1972	0.1092	0.0779	0.0146
52	-0.0262	0.3627	0.3163	0.1994	0.1132	0.0767	0.0179
53	-0.0089	0.3682	0.3181	0.1856	0.1132	0.0869	0.0335
54	-0.0004	0.3142	0.309	0.1834	0.1299	0.0764	0.0203
55	-0.0129	0.3652	0.3195	0.2068	0.1034	0.0674	0.0396
56	-0.0035	0.3633	0.2933	0.1799	0.0951	0.0887	0.0253
57	-0.0083	0.3597	0.2904	0.1747	0.11	0.0784	0.028
58	0.0016	0.3541	0.3043	0.2263	0.0993	0.0678	0.0244
59	-0.0185	0.3593	0.3114	0.189	0.1107	0.077	0.0116
60	-0.0045	0.3461	0.3385	0.1838	0.1058	0.0724	0.0295
61	-0.014	0.3286	0.3567	0.2122	0.107	0.0773	0.0308
62	-0.0108	0.3432	0.3293	0.1678	0.1151	0.0605	0.037
63	-0.0117	0.3149	0.3544	0.184	0.1198	0.0828	0.0394
64	-0.0062	0.3512	0.2977	0.1884	0.1099	0.0775	0.016
65	0.011	0.3245	0.3015	0.2082	0.1417	0.0724	0.0297
66	0.0064	0.3306	0.3537	0.1907	0.1007	0.0982	0.0221
67	-0.0033	0.3734	0.3192	0.1896	0.1204	0.0905	0.0381
68	0.0004	0.3567	0.3255	0.1925	0.1269	0.0712	0.0157

## Sheet: Figure 5A4-AjkissR2
Time(s)	Hanks	Ajkiss1b/ DMSO	Ajkiss1b/ PTX	Ajkiss1b/ U73122	Ajkiss1b/ BAPTA-AM	Ajkiss1b/ EGTA	Ajkiss1b/ FR900359
1	0	0	0	0	0	0	0
2	0.0025	0.0217	0.0422	0.0016	0.0096	0.0021	0.0187
3	0.0077	-0.0059	0.0433	0.0017	0.007	0.0243	0.007
4	-0.004	0.0356	0.0227	0.0306	0.0361	0.0249	0.0113
5	-0.0175	0.0537	0.009	0.0289	0.0209	0.0091	0.0088
6	-0.0016	0.052	0.0225	0.0348	0.0085	0.0478	0.0195
7	0.0096	0.0838	0.0456	0.0233	0.0118	0.0145	0.0226
8	-0.0201	0.0519	0.0352	0.0598	0.0214	0.0167	0.0117
9	0.0062	0.1579	0.1473	0.0951	0.0939	0.0703	0.0455
10	0.016	0.1597	0.1606	0.0967	0.0962	0.0803	0.0438
11	0.0175	0.1735	0.1627	0.1194	0.1026	0.087	0.0314
12	0.0037	0.1653	0.1505	0.1036	0.1071	0.0711	0.0474
13	0.0009	0.1628	0.1788	0.0882	0.1132	0.1176	0.0273
14	0.0014	0.1946	0.2121	0.1088	0.1239	0.093	0.0404
15	0.0051	0.1598	0.1378	0.0995	0.1199	0.103	0.0332
16	-0.013	0.1908	0.1606	0.1008	0.1193	0.0674	0.0445
17	0.0219	0.1901	0.1873	0.1176	0.1154	0.1246	0.0408
18	-0.0159	0.1805	0.1618	0.1164	0.1073	0.0699	0.0267
19	-0.0305	0.1616	0.1374	0.1449	0.1194	0.0902	0.0348
20	-0.0101	0.1752	0.1847	0.13	0.1082	0.1297	0.0372
21	-0.0037	0.1799	0.1661	0.1305	0.105	0.1145	0.0291
22	0.0233	0.14	0.1498	0.1293	0.0951	0.1156	0.0447
23	0.0022	0.1612	0.1674	0.1518	0.105	0.0921	0.0352
24	-0.0018	0.1635	0.1704	0.1248	0.1146	0.1007	0.0547
25	-0.009	0.1763	0.1441	0.1231	0.0909	0.1032	0.0441
26	0.0151	0.186	0.1745	0.1292	0.0909	0.0852	0.0598
27	0.0076	0.1946	0.1456	0.1493	0.083	0.095	0.0465
28	-0.0001	0.1777	0.1499	0.1441	0.0991	0.0992	0.0458
29	-0.0056	0.1635	0.1635	0.1056	0.1109	0.1225	0.0301
30	0.0082	0.1666	0.1752	0.1366	0.0905	0.1036	0.0456
31	0.0299	0.1727	0.1746	0.1477	0.1	0.0845	0.0294
32	0.0197	0.1903	0.2073	0.1325	0.0979	0.0941	0.0529
33	0.01	0.1562	0.1802	0.114	0.1113	0.1083	0.0483
34	-0.0022	0.1762	0.16	0.1656	0.0997	0.0957	0.0461
35	0.0056	0.1628	0.1851	0.1268	0.1176	0.1096	0.0453
36	0.0022	0.2184	0.1637	0.1383	0.1053	0.101	0.0472
37	-0.0006	0.1915	0.1415	0.1435	0.1088	0.0756	0.048
38	0.0171	0.1704	0.1816	0.1313	0.1065	0.1158	0.0341
39	0.0194	0.1732	0.1466	0.1319	0.136	0.1249	0.0682
40	0.0169	0.1873	0.1833	0.1404	0.1101	0.0862	0.0562
41	0.0258	0.162	0.1778	0.112	0.1293	0.0941	0.0557
42	0.0071	0.1773	0.1697	0.1468	0.1253	0.1138	0.0225
43	0.0133	0.2194	0.1664	0.1596	0.1173	0.1128	0.0797
44	0.0267	0.2066	0.1995	0.1084	0.1213	0.116	0.0466
45	0.0064	0.1966	0.1807	0.1556	0.1133	0.111	0.0456
46	0.03	0.1855	0.1736	0.1265	0.1235	0.1073	0.0516
47	-0.0163	0.2119	0.1818	0.1493	0.1179	0.1154	0.032
48	0.0068	0.192	0.1423	0.1608	0.1042	0.1037	0.0489
49	0.0052	0.1918	0.1775	0.1202	0.0963	0.0911	0.0428
50	0.0109	0.196	0.1749	0.1167	0.1087	0.092	0.0511
51	0.0147	0.1953	0.167	0.1394	0.1151	0.1117	0.047
52	0.0144	0.2219	0.1748	0.1374	0.1038	0.1088	0.0529
53	0.0023	0.1703	0.1822	0.1406	0.1101	0.0906	0.0454
54	-0.0049	0.2006	0.1796	0.1299	0.1014	0.1192	0.027
55	0.0057	0.2261	0.1893	0.1299	0.0914	0.143	0.0407
56	0.0067	0.2027	0.1771	0.126	0.0941	0.1055	0.0306
57	0.031	0.1778	0.2014	0.1488	0.1095	0.0869	0.0586
58	-0.0035	0.1742	0.1921	0.1632	0.1226	0.13	0.0443
59	-0.0012	0.2076	0.1858	0.1476	0.1079	0.1101	0.024
60	-0.0037	0.1854	0.1703	0.1299	0.0911	0.1287	0.0556
61	0.0032	0.1811	0.145	0.1448	0.1064	0.0947	0.0515
62	0.0009	0.2612	0.1752	0.1445	0.1004	0.1044	0.0584
63	0.0401	0.2234	0.1928	0.1366	0.1123	0.086	0.026
64	0.0203	0.2211	0.1805	0.1438	0.1146	0.1389	0.0416
65	-0.0008	0.2001	0.1714	0.1262	0.0988	0.122	0.0534
66	0.0389	0.2175	0.1673	0.1199	0.1092	0.1195	0.0486
67	0.0344	0.2352	0.1743	0.1314	0.1327	0.1325	0.0583
68	0.0299	0.2005	0.1812	0.1314	0.1376	0.1015	0.0293

## Sheet: Figure 5B
AjKissR1/AjKiss1a
	Concentration of peptide	Specific binding of FITC-AjKiss1a
	1e-05	58.7522	43.7233	65.5893
	1e-06	66.7292	48.899	73.1986
	1e-07	81.8091	67.2338	95.5742
	1e-08	74.0476	72.9717	63.4904
	1e-09	76.5491	53.0815	78.4553
	1e-10	80.8953	67.1237	106.818
	1e-11	90.5257	88.1651	121.309
AjKissR2/AjKiss1a
	Concentration of peptide	Specific binding of FITC-AjKiss1a
	1e-05	59.3563	45.1825	40.145
	1e-06	51.7818	47.8022	40.8137
	1e-07	70.3922	61.4264	78.8598
	1e-08	85.4865	91.9806	84.8247
	1e-09	73.0583	99.147	97.4607
	1e-10	81.602	97.5484	90.0735
	1e-11	93.203	94.6551	112.142
AjKissR1/AjKiss1b
	Concentration of peptide	Specific binding of FITC-AjKiss1a
	1e-05	28.5812	31.9009	19.6809
	1e-06	48.6291	28.3703	37.0502
	1e-07	87.5311	98.4013	68.5599
	1e-08	101.279	66.1334	72.8382
	1e-09	102.057	86.3458	70.6669
	1e-10	100.777	92.6572	130.52
	1e-11	115.083	79.4343	105.483
AjKissR2/AjKiss1b
	Concentration of peptide	Specific binding of FITC-AjKiss1a
	1e-05	90.8011	73.6942	69.2111
	1e-06	101.217	87.9798	96.4665
	1e-07	96.3209	106.545	84.3042
	1e-08	102.431	101.633	110.271
	1e-09	102.87	132.333	134.369
	1e-10	95.286	105.515	114.54
	1e-11	91.7933	114.66	93.5466
