# Supplementary material for: Existence and functions of a kisspeptin neuropeptide signaling system in a non-chordate deuterostome species
Source: eLife. 2020 Jun 9;9:e53370. doi: 10.7554/eLife.53370 (PMC7282810; doi:10.7554/eLife.53370)
Supplement: Figure 7—figure supplement 5—source data 1. [file elife-53370-fig7-figsupp5-data1.xlsx]

## Sheet: Body weight + ROW and RGM
	Nov	body weight (g)	76.4	88.3	93.3	84.4	95.5	70.6		0	0	0.00321543	0	0	0	0.0159686	0.0141563	0.0148982	0.0152844	0.0143455	0.013881
		Ovarian weight (g)			0.3
		intestine weight (g)	1.22	1.25	1.39	1.29	1.37	0.98
	Dec	body weight (g)	92	102.8	86.4	93.4	71.8	67.3		0	0.00291829	0.00925926	0	0.00696379	0	0.0226087	0.0224708	0.0228009	0.022591	0.0228412	0.0194651
		Ovarian weight (g)		0.3	0.8		0.5
		intestine weight (g)	2.08	2.31	1.97	2.11	1.64	1.31
	Feb	body weight (g)	94.6	74.3	86.8	74.4	94.7	86.2		0	0.00403769	0	0.00537634	0	0.00348028	0.0273784	0.0254374	0.0279954	0.0258065	0.0275607	0.0295824
		Ovarian weight (g)		0.3		0.4		0.3
		intestine weight (g)	2.59	1.89	2.43	1.92	2.61	2.55
	Mar	body weight (g)	89.4	85.9	85.4	94.1	74.9	86.5		0.0145414	0.00814901	0	0.00956429	0.00667557	0.0127168	0.0353468	0.0346915	0.0334895	0.0348565	0.0273698	0.029711
		Ovarian weight (g)	1.3	0.7		0.9	0.5	1.1
		intestine weight (g)	3.16	2.98	2.86	3.28	2.05	2.57
	Apr	body weight (g)	77.5	93.8	72.3	81.1	79.3	91.2		0.0245161	0.0159915	0.0124481	0.0147965	0.00882724	0.0186404	0.0273548	0.0259062	0.0289073	0.0277435	0.02686	0.027193
		Ovarian weight (g)	1.9	1.5	0.9	1.2	0.7	1.7
		intestine weight (g)	2.12	2.43	2.09	2.25	2.13	2.48
	May	body weight (g)	73.7	89.4	93.5	92.6	81.5	91.9		0.0407056	0.0939597	0.0663102	0.0518359	0.117791	0.0435256	0.0142469	0.0192394	0.0204278	0.0197624	0.0198773	0.0191513
		Ovarian weight (g)	3	8.4	6.2	4.8	9.6	4
		intestine weight (g)	1.05	1.72	1.91	1.83	1.62	1.76
	Jun	body weight (g)	74.1	84.9	86.5	101.1	75.9	95.4		0	0.00942285	0	0.00692384	0	0.0146751	0.0118758	0.0186101	0.0160694	0.0181998	0.012253	0.0138365
		Ovarian weight (g)		0.8		0.7		1.4
		intestine weight (g)	0.88	1.58	1.39	1.84	0.93	1.32
	Aug	body weight (g)	106.1	70.1	83.7	78.2	75.6	95.3		0	0	0	0	0	0	0.00970782	0.00527817	0.0051374	0.00741688	0.0042328	0.00482686
		Ovarian weight (g)
		intestine weight (g)	1.03	0.37	0.43	0.58	0.32	0.46
										Ovarian index (ROW)						Intestine index (RGM)
										0	0	0.321543	0	0	0	1.59686	1.41563	1.48982	1.52844	1.43455	1.3881
										0	0.291829	0.925926	0	0.696379	0	2.26087	2.24708	2.28009	2.2591	2.28412	1.94651
										0	0.403769	0	0.537634	0	0.348028	2.73784	2.54374	2.79954	2.58065	2.75607	2.95824
										1.45414	0.814901	0	0.956429	0.667557	1.27168	3.53468	3.46915	3.34895	3.48565	2.73698	2.9711
										2.45161	1.59915	1.24481	1.47965	0.882724	1.86404	2.73548	2.59062	2.89073	2.77435	2.686	2.7193
										4.07056	9.39597	6.63102	5.18359	11.7791	4.35256	1.42469	1.92394	2.04278	1.97624	1.98773	1.91513
										0	0.942285	0	0.692384	0	1.46751	1.18758	1.86101	1.60694	1.81998	1.2253	1.38365
			Body weight
		NOV	76.4	88.3	93.3	84.4	95.5	70.6
		DEC	92	102.8	86.4	93.4	71.8	67.3
		FEB	94.6	74.3	86.8	74.4	94.7	86.2
		MAR	89.4	85.9	85.4	94.1	74.9	86.5
		APR	77.5	93.8	72.3	81.1	79.3	91.2
		MAY	73.7	89.4	93.5	92.6	81.5	91.9
		JUN	74.1	84.9	86.5	101.1	75.9	95.4
		AUG	106.1	70.1	83.7	78.2	75.6	95.3
			Ovarian index (ROW)						Intestine index (RGM)
		NOV			0.321543				1.59686	1.41563	1.48982	1.52844	1.43456	1.3881
		DEC		0.291829	0.925926		0.696379		2.26087	2.24708	2.28009	2.2591	2.28412	1.94651
		FEB		0.403769		0.537634		0.348028	2.73784	2.54374	2.79954	2.58065	2.75607	2.95824
		MAR	1.45414	0.814901		0.956429	0.667557	1.27168	3.53468	3.46915	3.34895	3.48565	2.73698	2.9711
		APR	2.45161	1.59915	1.24481	1.47965	0.882724	1.86404	2.73548	2.59062	2.89073	2.77435	2.686	2.7193
		MAY	4.07056	9.39597	6.63102	5.18358	11.7791	4.35256	1.4247	1.92394	2.04278	1.97624	1.98773	1.91512
		JUN		0.942285		0.692384		1.46751	1.18758	1.86101	1.60694	1.81998	1.2253	1.38365
		AUG							0.970782	0.527817	0.51374	0.741688	0.42328	0.482686
