# Supplementary material for: Existence and functions of a kisspeptin neuropeptide signaling system in a non-chordate deuterostome species
Source: eLife. 2020 Jun 9;9:e53370. doi: 10.7554/eLife.53370 (PMC7282810; doi:10.7554/eLife.53370)
Supplement: Figure 7—source data 1. [file elife-53370-fig7-data1.xlsx]

## Sheet: Figure 7E+F
body weight	BLANK					PBS					ApojaKiss1b-10					ApojaKiss1b-10 + Pep234
0 d	105.66	104.79	94.27	87.99	82.29	106.03	103.89	96.39	89.43	79.26	98.06	98.07	92.01	96.02	84.78	104.38	94.43	93.42	91.39	91.12
8 d	110.3	104.6	87.6	85.96	80.36	99.61	98	92.64	87.82	73.15	96.94	93.67	91.94	89.69	85.3	111.69	90.78	87.93	83.57	82.86
16 d	104.31	104.31	92.72	86.44	76.11	98.43	98.32	86.43	80.33	72.08	88.05	85.4	82.44	80.19	76.72	110.07	94.84	86.51	85.5	81.33
24 d	106.24	103.34	98.52	83.45	77.36	96.93	91.68	86.43	86.43	73.15	87.13	84.78	82.84	75.18	66.4	97.68	92.81	87.02	85.5	75.44
32 d	103.44	102.57	101.9	83.16	78.23	95.64	87.72	86.75	83.75	68.97	89.48	79.58	77.63	73.96	67.83	100.42	93.62	84.48	75.65	69.25
40 d	110.11	106.92	100.93	85.48	81.13	97.78	91.04	87.61	82.47	77.44	88.36	79.17	78.25	74.88	70.69	108.24	94.63	85.29	77.47	76.15
	BLANK					PBS					ApojaKiss1b-10					ApojaKiss1b-10 + Pep234
Intestine weight	1.41	2.21	2.1	1.65	1.27	1.84	0.67	1.3	1.1	1.74	0.04	0.04	0.14	0.04	0.13	1.43	0.86	0.98	1.27	1.35
Respiratory tree weight	0.53	2.12	1.49	0.8	1.81	0.56	1.11	0.67	1.17572	1.15861	1.63	0.51	0.04	0.81	2.01	2.87	1.4	0.72	1.42	0.85
Tissue index
Intestine	1.28054	2.06697	2.08065	1.93028	1.56539	1.88178	0.73594	1.48385	1.33382	2.2469	0.0452694	0.0505242	0.178914	0.0534188	0.183902	1.32114	0.908803	1.14902	1.63934	1.77282
Respiratory tree	0.481337	1.98279	1.47627	0.935891	2.23099	0.572714	1.21924	0.764753	1.42563	1.49615	1.84473	0.644183	0.0511182	1.08173	2.8434	2.65152	1.47945	0.844179	1.83297	1.11622
Body weight on 40d One way ANOVA multiple comparisons
Number of families	1									ANOVA summary
Number of comparisons per family	6									F	2.587
Alpha	0.05									P value	0.0891
										P value summary	ns
Tukey's multiple comparisons test	Mean Diff.	95.00% CI of diff.	Significant?	Summary	Adjusted P Value					Significant diff. among means (P < 0.05)?	No
										R square	0.3267
BLANK vs. PBS	9.646	-9.535 to 28.83	No	ns	0.4948	A-B
BLANK vs. ApojaKiss1b-10	18.64	-0.5371 to 37.83	No	ns	0.0583	A-C				Brown-Forsythe test
BLANK vs. ApojaKiss1b-10 + Pep234	8.558	-10.62 to 27.74	No	ns	0.59	A-D				F (DFn, DFd)	0.9889 (3, 16)
PBS vs. ApojaKiss1b-10	8.998	-10.18 to 28.18	No	ns	0.5511	B-C				P value	0.423
PBS vs. ApojaKiss1b-10 + Pep234	-1.088	-20.27 to 18.09	No	ns	0.9984	B-D				P value summary	ns
ApojaKiss1b-10 vs. ApojaKiss1b-10 + Pep234	-10.09	-29.27 to 9.095	No	ns	0.4578	C-D				Are SDs significantly different (P < 0.05)?	No
										Bartlett's test
Test details	Mean 1	Mean 2	Mean Diff.	SE of diff.	n1	n2	q	DF		Bartlett's statistic (corrected)	2.583
										P value	0.4604
BLANK vs. PBS	96.91	87.27	9.646	6.704	5	5	2.035	16		P value summary	ns
BLANK vs. ApojaKiss1b-10	96.91	78.27	18.64	6.704	5	5	3.933	16		Are SDs significantly different (P < 0.05)?	No
BLANK vs. ApojaKiss1b-10 + Pep234	96.91	88.36	8.558	6.704	5	5	1.805	16
PBS vs. ApojaKiss1b-10	87.27	78.27	8.998	6.704	5	5	1.898	16		ANOVA table	SS	DF	MS	F (DFn, DFd)	P value
PBS vs. ApojaKiss1b-10 + Pep234	87.27	88.36	-1.088	6.704	5	5	0.2295	16		Treatment (between columns)	872.2	3	290.7	F (3, 16) = 2.587	P=0.0891
ApojaKiss1b-10 vs. ApojaKiss1b-10 + Pep234	78.27	88.36	-10.09	6.704	5	5	2.128	16		Residual (within columns)	1798	16	112.4
										Total	2670	19
										Data summary
										Number of treatments (columns)	4
										Number of values (total)	20
Intestine index One way ANOVA multiple comparisons
Number of families	1									Table Analyzed	40 Figure 7E-INT TATIO
Number of comparisons per family	6									Data sets analyzed	A : BLANK	B : PBS	C : ApojaKiss1b-10	D : ApojaKiss1b-10 + Pep234
Alpha	0.05
										ANOVA summary
Tukey's multiple comparisons test	Mean Diff.	95.00% CI of diff.	Significant?	Summary	Adjusted P Value					F	19.38
										P value	<0.0001
BLANK vs. PBS	0.2483	-0.4405 to 0.9371	No	ns	0.734	A-B				P value summary	****
BLANK vs. ApojaKiss1b-10	1.682	0.9936 to 2.371	Yes	****	<0.0001	A-C				Significant diff. among means (P < 0.05)?	Yes
BLANK vs. ApojaKiss1b-10 + Pep234	0.4265	-0.2622 to 1.115	No	ns	0.3219	A-D				R square	0.7842
PBS vs. ApojaKiss1b-10	1.434	0.7453 to 2.123	Yes	***	0.0001	B-C
PBS vs. ApojaKiss1b-10 + Pep234	0.1782	-0.5105 to 0.867	No	ns	0.8794	B-D				Brown-Forsythe test
ApojaKiss1b-10 vs. ApojaKiss1b-10 + Pep234	-1.256	-1.945 to -0.5671	Yes	***	0.0004	C-D				F (DFn, DFd)	1.961 (3, 16)
										P value	0.1606
										P value summary	ns
Test details	Mean 1	Mean 2	Mean Diff.	SE of diff.	n1	n2	q	DF		Are SDs significantly different (P < 0.05)?	No
BLANK vs. PBS	1.785	1.536	0.2483	0.2407	5	5	1.459	16		Bartlett's test
BLANK vs. ApojaKiss1b-10	1.785	0.1024	1.682	0.2407	5	5	9.883	16		Bartlett's statistic (corrected)	10.25
BLANK vs. ApojaKiss1b-10 + Pep234	1.785	1.358	0.4265	0.2407	5	5	2.506	16		P value	0.0166
PBS vs. ApojaKiss1b-10	1.536	0.1024	1.434	0.2407	5	5	8.424	16		P value summary	*
PBS vs. ApojaKiss1b-10 + Pep234	1.536	1.358	0.1782	0.2407	5	5	1.047	16		Are SDs significantly different (P < 0.05)?	Yes
ApojaKiss1b-10 vs. ApojaKiss1b-10 + Pep234	0.1024	1.358	-1.256	0.2407	5	5	7.377	16
										ANOVA table	SS	DF	MS	F (DFn, DFd)	P value
										Treatment (between columns)	8.424	3	2.808	F (3, 16) = 19.38	P<0.0001
										Residual (within columns)	2.318	16	0.1449
										Total	10.74	19
										Data summary
										Number of treatments (columns)	4
										Number of values (total)	20
Respiratory tree One way ANOVA multiple comparisons
Number of families	1									Table Analyzed	Figure 6F-RESPIRATORY TREE
Number of comparisons per family	6									Data sets analyzed	A : BLANK	B : PBS	C : ApojaKissb-10	D : pep234+AjKiss1b-10
Alpha	0.05
										ANOVA summary
Tukey's multiple comparisons test	Mean Diff.	95.00% CI of diff.	Significant?	Summary	Adjusted P Value					F	0.3614
										P value	0.7817
BLANK vs. PBS	0.3257	-1.065 to 1.717	No	ns	0.9069	A-B				P value summary	ns
BLANK vs. ApojaKissb-10	0.1284	-1.263 to 1.519	No	ns	0.9933	A-C				Significant diff. among means (P < 0.05)?	No
BLANK vs. pep234+AjKiss1b-10	-0.1633	-1.554 to 1.228	No	ns	0.9864	A-D				R square	0.06346
PBS vs. ApojaKissb-10	-0.1973	-1.588 to 1.194	No	ns	0.9766	B-C
PBS vs. pep234+AjKiss1b-10	-0.4891	-1.88 to 0.9019	No	ns	0.7483	B-D				Brown-Forsythe test
ApojaKissb-10 vs. pep234+AjKiss1b-10	-0.2917	-1.683 to 1.099	No	ns	0.9306	C-D				F (DFn, DFd)	0.9558 (3, 16)
										P value	0.4374
										P value summary	ns
Test details	Mean 1	Mean 2	Mean Diff.	SE of diff.	n1	n2	q	DF		Are SDs significantly different (P < 0.05)?	No
BLANK vs. PBS	1.421	1.096	0.3257	0.4862	5	5	0.9475	16		Bartlett's test
BLANK vs. ApojaKissb-10	1.421	1.293	0.1284	0.4862	5	5	0.3735	16		Bartlett's statistic (corrected)	3.163
BLANK vs. pep234+AjKiss1b-10	1.421	1.585	-0.1633	0.4862	5	5	0.4751	16		P value	0.3671
PBS vs. ApojaKissb-10	1.096	1.293	-0.1973	0.4862	5	5	0.574	16		P value summary	ns
PBS vs. pep234+AjKiss1b-10	1.096	1.585	-0.4891	0.4862	5	5	1.423	16		Are SDs significantly different (P < 0.05)?	No
ApojaKissb-10 vs. pep234+AjKiss1b-10	1.293	1.585	-0.2917	0.4862	5	5	0.8486	16
										ANOVA table	SS	DF	MS	F (DFn, DFd)	P value
										Treatment (between columns)	0.6407	3	0.2136	F (3, 16) = 0.3614	P=0.7817
										Residual (within columns)	9.455	16	0.591
										Total	10.1	19
										Data summary
										Number of treatments (columns)	4
										Number of values (total)	20

## Sheet: Figure 7H NOV
							δCT			2-δCT			AVERAGE	SE	AVERAGE	SE	AVERAGE	SE
	KISSR1	KISSR2	KP	TUBB	ACTIN	internal control	KISSR1	KISSR2	KP	KISSR1	KISSR2	KP	KISSR1	KISSR1	KISSR2	KISSR2	KP	KP
Respiratory tree	31.4	26.15	37.77	20.67	30.02	24.9101	6.48989	1.23989	12.8599	0.0111262	0.423404	0.00013452	0.0629913	0.0198756	0.223762	0.0173827	0.000642236	9.41836e-05	Respiratory tree	0.0629913	0.0198756	6
Respiratory tree	32.65	26.44	32.93	20.62	27.15	23.6608	8.98921	2.77921	9.26921	0.00196779	0.145671	0.00162065							Muscle	0.0438516	0.00845084	6
Respiratory tree	26.96	27.75	35.37	22.57	28.24	25.2463	1.71368	2.50368	10.1237	0.304882	0.176327	0.000896333							Intestine	0.14136	0.0466877	6
Respiratory tree	30.56	25.02	36.03	19.93	26.47	22.9684	7.59161	2.05161	13.0616	0.0051844	0.241215	0.000116967							Neural ring	0.0355792	0.00508277	6
Respiratory tree	30.02	26.71	34.56	20.82	27.58	23.9628	6.0572	2.7472	10.5972	0.0150176	0.148939	0.000645541							Ovarian	0.0103844	#DIV/0!	1
Respiratory tree	28.76	26.38	35.26	21.25	27.35	24.1078	4.65217	2.27217	11.1522	0.0397702	0.207018	0.000439402							Testis	0.0267398	0.00425945	2
muscle	32.39	31.58	32.79	22.45	30.27	26.0684	6.3216	5.5116	6.7216	0.0125028	0.0219201	0.00947539	0.0438516	0.00845084	0.0605298	0.00704386	0.0151001	0.00279289
muscle	32.09	29.17	31.75	21.46	29.64	25.2205	6.86948	3.94948	6.52948	0.00855222	0.0647272	0.010825							Respiratory tree	0.223762	0.0173827	6
muscle	32.04	32.32	35.6	23.7	30.14	26.7267	5.31327	5.59327	8.87327	0.0251505	0.0207137	0.00213245							Muscle	0.0605298	0.00704386	6
muscle	31.02	29.98	31.96	22.29	31.24	26.3882	4.63175	3.59175	5.57175	0.040337	0.082942	0.021025							Intestine	0.177168	0.0176964	6
muscle	27.98	28.12	34.98	20.94	30.3	25.1889	2.79107	2.93107	9.79107	0.144478	0.131117	0.00112874							Neural ring	0.14624	0.00650643	6
muscle	31.53	31.15	31.01	23	30.69	26.5682	4.96179	4.58179	4.44179	0.0320888	0.0417585	0.0460139							Ovarian	0.0215011	#DIV/0!	1
intestine	33.22	27.36	28.87	20.37	31.95	25.5112	7.7088	1.8488	3.3588	0.00477992	0.277624	0.0974768	0.14136	0.0466877	0.177168	0.0176964	0.0615906	0.0149568	Testis	0.315718	0.0112606	2
intestine	33.4	30.62	33.37	20.94	33.2	26.3668	7.0332	4.2532	7.0032	0.00763475	0.0524395	0.00779518
intestine	31.32	28.25	31.3	20.94	30.54	25.2885	6.03151	2.96151	6.01151	0.0152874	0.12838	0.0155008							Respiratory tree	0.000642236	9.41836e-05	6
intestine	26.84	29.21	32.27	22.72	30.54	26.3414	0.498611	2.86861	5.92861	0.707788	0.136919	0.0164176							Muscle	0.0151001	0.00279289	6
intestine	31.77	26.43	26.97	19.94	30.97	24.8504	6.91961	1.57961	2.11961	0.00826018	0.334572	0.230109							Intestine	0.0615906	0.0149568	6
intestine	29.08	28.73	34.62	21.83	30.54	25.8203	3.25969	2.90969	8.79969	0.104408	0.133074	0.00224403							Neural ring	0.104205	0.0161914	6
anterior part	27.68	25.28	28.67	19.06	26.33	22.402	5.278	2.878	6.268	0.025773	0.136031	0.0129761	0.0355792	0.00508277	0.14624	0.00650643	0.104205	0.0161914	Ovarian	0.000183817	#DIV/0!	1
anterior part	29.75	26.47	27	19.91	28.26	23.7204	6.02962	2.74962	3.27962	0.0153075	0.14869	0.102976							Testis	0.110472	0.00899886	2
anterior part	29.13	26.2	25.33	19.91	27.35	23.3353	5.79465	2.86465	1.99465	0.0180151	0.137295	0.250929
anterior part	26.46	25.36	29.35	19.12	27.81	23.0592	3.40079	2.30079	6.29079	0.0946805	0.202952	0.0127727
anterior part	29.02	26.79	25.65	19.57	27.58	23.2323	5.78768	3.55768	2.41768	0.0181023	0.0849241	0.187157
anterior part	27.79	25.78	27.3	19.52	27.58	23.2026	4.58738	2.57738	4.09738	0.0415969	0.167545	0.0584206
ovary	29.09	28.04	34.91	17.5	28.93	22.5006	6.58944	5.53944	12.4094	0.0103844	0.0215011	0.000183817	0.0103844	#DIV/0!	0.0215011	#DIV/0!	0.000183817	#DIV/0!
testis	30.29	27.27	28.56	20.78	30.84	26.43	6.85	1.9	3.79	0.00866851	0.267943	0.072293	0.0267398	0.00425945	0.315718	0.0112606	0.110472	0.00899886
testis	33.28	28.33	30.22	20.54	32.32	25.81	4.48	1.46	2.75	0.0448111	0.363493	0.148651

## Sheet: Figure 7H DEC
							δCT			2-δCT			AVERAGE	SE	AVERAGE	SE	AVERAGE	SE
	KISSR1	KISSR2	KP	TUBB	ACTIN	internal control	KISSR1	KISSR2	KP	KISSR1	KISSR2	KP	KISSR1	KISSR1	KISSR2	KISSR2	KP	KP
Respiratory tree	29.68	30.65	28.44	25.59	26.76	26.1685	3.51154	4.48154	2.27154	0.0876843	0.0447634	0.207109	0.243399	0.0163003	0.129179	0.0108206	0.509102	0.0527536	Respiratory tree	0.243399	0.0163003	6
Respiratory tree	29.12	29.59	28.29	25.12	29.16	27.0647	2.05528	2.52528	1.22528	0.240602	0.173706	0.427715							Muscle	0.122027	0.0143694	6
Respiratory tree	29.27	31.08	28.36	24.57	31.49	27.8156	1.45437	3.26437	0.54437	0.364915	0.10407	0.685691							Intestine	0.00253785	0.00044018	6
Respiratory tree	28.94	29.59	28.39	24.49	30.32	27.2495	1.69047	2.34047	1.14047	0.309826	0.197446	0.453611							Neural ring	0.808165	0.129801	6
Respiratory tree	29.47	30.87	26.96	25.08	29.13	27.0293	2.44075	3.84075	-0.0692508	0.184188	0.0697942	1.04917							Ovarian	6.70326e-05	7.88716e-06	3
Respiratory tree	29.03	29.59	29.27	24.8	29.74	27.1579	1.87209	2.43209	2.11209	0.273177	0.185297	0.231311							Testis	0.00142997	7.35572e-05	2
muscle	28.86	28.13	25.8	24.25	27.16	25.6638	3.19621	2.46621	0.136212	0.109105	0.180966	0.909905	0.122027	0.0143694	0.265614	0.0323501	0.166372	0.0607584
muscle	28.8	27.63	29.3	22.43	23.11	22.7675	6.03254	4.86254	6.53254	0.0152765	0.034374	0.0108021							Respiratory tree	0.129179	0.0108206	6
muscle	28.79	28.15	31.25	25.43	28.28	26.8172	1.97283	1.33283	4.43283	0.254752	0.396988	0.0463003							Muscle	0.265614	0.0323501	6
muscle	28.95	26.92	32.52	25.32	26.94	26.1174	2.83256	0.802558	6.40256	0.140383	0.573332	0.0118206							Intestine	0.278232	0.0985611	6
muscle	28.83	28.14	32.34	24.84	27.72	26.2405	2.58948	1.89948	6.09948	0.166145	0.26804	0.0145839							Neural ring	0.00295566	0.000547069	6
muscle	28.87	27.28	32.14	23.88	25.02	24.4434	4.42665	2.83665	7.69665	0.0464994	0.139986	0.00482035							Ovarian	0.000232502	4.34334e-05	3
intestine	34.17	30.34	28.37	21.51	26.7	23.9649	10.2051	6.37509	4.40509	0.000847154	0.0120478	0.0471994	0.00253785	0.00044018	0.278232	0.0985611	0.194104	0.0335307	Testis	0.0405755	0.00330521	2
intestine	33.77	26.14	28.35	26.16	27.27	26.7092	7.06077	-0.569234	1.64077	0.00749027	1.48374	0.320686
intestine	34.29	27.48	27.9	21.52	26.96	24.0869	10.2031	3.39309	3.81309	0.000848328	0.0951871	0.0711452							Respiratory tree	0.509102	0.0527536	6
intestine	33.71	30.91	28.21	22.94	26.1	24.469	9.24096	6.44096	3.74096	0.0016527	0.0115101	0.0747927							Muscle	0.166372	0.0607584	6
intestine	34.23	28.91	27.34	21.52	26.83	24.0288	10.2012	4.88123	3.31123	0.00084942	0.0339314	0.100744							Intestine	0.194104	0.0335307	6
intestine	33.74	30.52	26.46	24.55	26.69	25.5976	8.14235	4.92235	0.862354	0.00353922	0.032978	0.550054							Neural ring	19.1014	4.88182	6
anterior part	30.27	37.3	23.79	27.2	27.61	27.4042	2.86577	9.89577	-3.61423	0.137189	0.00104973	12.246	0.808165	0.129801	0.00295566	0.000547069	19.1014	4.88182	Ovarian	0.0675786	0.00180817	3
anterior part	27.74	38.72	22.03	29.35	27.27	28.2909	-0.550891	10.4291	-6.26089	1.46499	0.000725313	76.686							Testis	0.0948603	0.0011613	2
anterior part	30.11	35.1	23.71	28.77	27.44	28.0971	2.01287	7.00287	-4.38713	0.24778	0.00779698	20.9246
anterior part	25.58	36	25	22.96	30.75	26.571	-0.991037	9.42896	-1.57104	1.98761	0.00145077	2.97118
anterior part	26.12	37.86	26.28	26.92	24.95	25.9163	0.203712	11.9437	0.363712	0.868314	0.000253854	0.777163
anterior part	30.02	34.49	27.21	25.4	29.16	27.2151	2.80486	7.27486	-0.00514284	0.143105	0.00645728	1.00357
ovary	37.92	32.96	26.15	19.71	24.74	22.0822	15.8378	10.8778	4.06776	1.7075e-05	0.000531457	0.0596325	6.70326e-05	7.88716e-06	0.000232502	4.34334e-05	0.0675786	0.00180817
ovary	33.97	35.03	24.82	18.41	23.58	20.8353	13.1347	14.1947	3.98475	0.000111185	5.3328e-05	0.0631643
ovary	35.44	34.81	25.34	19.71	23.88	21.695	13.745	13.115	3.64496	7.28375e-05	0.000112721	0.0799389
testis	34.05	29.08	28.36	22.9	26.87	24.885	9.165	4.195	3.475	0.00174205	0.0545983	0.0899333	0.00142997	7.35572e-05	0.0405755	0.00330521	0.0948603	0.0011613
testis	34.08	29.51	27.6	21.94	26.61	24.275	9.805	5.235	3.325	0.00111789	0.0265527	0.0997873

## Sheet: Figure 7H FEB
							δCT			2-δCT			AVERAGE	SE	AVERAGE	SE	AVERAGE	SE
	KISSR1	KISSR2	KP	TUBB	ACTIN	internal control	KISSR1	KISSR2	KP	KISSR1	KISSR2	KP	KISSR1	KISSR1	KISSR2	KISSR2	KP	KP
Respiratory tree	26.7	30.44	27.86	25.88	31.01	28.3291	-1.62912	2.11088	-0.469116	3.09323	0.231505	1.38426	0.988586	0.176304	1.09427	0.192279	0.926763	0.212791	Respiratory tree	0.988586	0.176304	6
Respiratory tree	27.19	25.26	28.38	24.32	29.72	26.8848	0.305239	-1.62476	1.49524	0.809308	3.08391	0.354722							Muscle	0.773701	0.168038	6
Respiratory tree	29.4	26.75	25.92	25.35	30.18	27.6598	1.74023	-0.909772	-1.73977	0.299322	1.87875	3.33982							Intestine	0.0247006	0.00355364	6
Respiratory tree	26.27	28.4	30.84	25.55	26.25	25.8976	0.372365	2.50236	4.94236	0.772515	0.176487	0.0325237							Neural ring	0.637324	0.103713	6
Respiratory tree	28.44	27.23	28.38	24.65	28.54	26.5238	1.91622	0.706218	1.85622	0.264948	0.612925	0.276199							Ovarian	0.255492	0.0263465	3
Respiratory tree	27.33	27.58	29.33	25.45	28.22	26.7992	0.530765	0.780765	2.53076	0.692188	0.582058	0.173047							Testis	0.0195888	0.00116345	4
muscle	26.68	28.58	30.03	23.9	30.36	26.937	-0.257038	1.64296	3.09296	1.19502	0.320198	0.117199	0.773701	0.168038	0.518669	0.124872	0.0853624	0.0111828
muscle	28.45	28.32	30.73	26.53	29.47	27.9614	0.488614	0.358614	2.76861	0.712709	0.779913	0.146745							Respiratory tree	1.09427	0.192279	6
muscle	27.14	27.57	31.08	27.14	29.96	28.5152	-1.37516	-0.945161	2.56484	2.59397	1.9254	0.169008							Muscle	0.518669	0.124872	6
muscle	29.38	29.19	30.38	22.65	25.68	24.1175	5.26254	5.07254	6.26254	0.0260506	0.0297176	0.0130253							Intestine	3.20117	0.349166	6
muscle	30.4	31.04	29.68	24.16	25.74	24.9375	5.46251	6.10251	4.74251	0.0226788	0.0145533	0.0373562							Neural ring	0.119192	0.0151883	6
muscle	29.76	30.88	31.43	24.89	27.82	26.3143	3.44575	4.56575	5.11575	0.0917754	0.0422253	0.0288407							Ovarian	0.213452	0.0103128	3
intestine	28.82	21.28	24.78	22.42	25.68	23.9947	4.8253	-2.7147	0.785301	0.0352728	6.56457	0.580231	0.0247006	0.00355364	3.20117	0.349166	2.03817	0.297411	Testis	2.7883	0.266516	4
intestine	30.45	22.98	22.13	23.6	25.34	24.4545	5.99547	-1.47453	-2.32453	0.0156741	2.77893	5.00902
intestine	29.73	23.57	25.48	25.45	25.97	25.7087	4.02131	-2.13869	-0.228685	0.0615834	4.40361	1.17177							Respiratory tree	0.926763	0.212791	6
intestine	30.72	23.2	21.83	21.93	21.39	21.6583	9.06168	1.54168	0.171683	0.00187138	0.343485	0.887806							Muscle	0.0853624	0.0111828	6
intestine	28.41	21.57	21.18	23.23	22.72	22.9736	5.43642	-1.40358	-1.79358	0.0230928	2.64558	3.46675							Intestine	2.03817	0.297411	6
intestine	30.23	22.38	23.53	23.69	23.68	23.685	6.545	-1.305	-0.154999	0.0107092	2.47084	1.11342							Neural ring	8.97004	0.98823	6
anterior part	29.59	28.59	22.53	22.22	30.91	26.2073	3.38275	2.38275	-3.67725	0.0958721	0.191744	12.7928	0.637324	0.103713	0.119192	0.0151883	8.97004	0.98823	Ovarian	0.26507	0.00965415	3
anterior part	28.63	29.72	25.88	24.16	28.53	26.2542	2.37577	3.46577	-0.374234	0.192674	0.0905108	1.29615							Testis	1.7332	0.124637	4
anterior part	26.53	31.77	22.18	23.4	27.96	25.5786	0.951415	6.19142	-3.39858	0.517125	0.0136835	10.5457
anterior part	24.38	29.77	23.23	20.27	29.97	24.6474	-0.267351	5.12265	-1.41735	1.2036	0.0287031	2.67095
anterior part	23.96	27.4	20.58	20.82	29.16	24.6396	-0.679627	2.76037	-4.05963	1.60173	0.147586	16.6751
anterior part	29.46	29.27	23.93	24.34	30.46	27.2286	2.2314	2.0414	-3.2986	0.212951	0.242927	9.83957
ovary	31.11	30.94	30.68	26.12	30.93	28.4234	2.68657	2.51657	2.25657	0.155333	0.174758	0.20927	0.255492	0.0263465	0.213452	0.0103128	0.26507	0.00965415
ovary	30.57	30.51	29.98	25.69	30.61	28.0423	2.52769	2.46769	1.93769	0.173416	0.18078	0.261033
ovary	29.9	30.52	30.33	26.62	30.96	28.7081	1.1919	1.8119	1.6219	0.437727	0.284816	0.324908
testis	28.96	21.81	21.89	23.37	23.01	24.1341	5.17586	-2.34414	-0.144138	0.0276637	5.07757	1.10507	0.0195888	0.00116345	2.7883	0.266516	1.7332	0.124637
testis	29.31	21.79	23.99	22.77	25.58	22.5785	6.5215	-0.518503	-1.1985	0.0108851	1.43247	2.29501
testis	30.03	23.46	24.39	24.39	24.59	24.4898	5.5402	-1.0298	-0.0997958	0.0214898	2.04174	1.07162
testis	29.1	22.06	21.38	22.84	22.32	23.1893	5.7707	-1.3793	-1.2993	0.0183167	2.60142	2.4611

## Sheet: Figure 7H MAR
							δCT			2-δCT			AVERAGE	SE	AVERAGE	SE	AVERAGE	SE
	KISSR1	KISSR2	KP	TUBB	ACTIN	internal control	KISSR1	KISSR2	KP	KISSR1	KISSR2	KP	KISSR1	KISSR1	KISSR2	KISSR2	KP	KP
Respiratory tree	26.15	24.4	28.32	23.4	20.45	21.8753	4.27467	2.52467	6.44467	0.0516649	0.173779	0.0114805	0.033328	0.004605	0.391126	0.0505676	0.648761	0.199339	Respiratory tree	0.033328	0.004605	6
Respiratory tree	25.84	22.49	25.34	21.86	18.49	20.1045	5.73549	2.38549	5.23549	0.0187692	0.19138	0.0265437							Muscle	0.68494	0.120818	6
Respiratory tree	26.89	23.77	26.49	24.5	22.07	23.2533	3.63672	0.516721	3.23672	0.0803967	0.698959	0.106084							Intestine	0.0317952	0.0069027	6
Respiratory tree	25.58	23.36	17.78	20.98	17.9	19.3789	6.20109	3.98109	-1.59891	0.013592	0.0633244	3.02914							Neural ring	0.700973	0.20858	6
Respiratory tree	28.23	21.63	21.83	23.18	19.6	21.315	6.91503	0.315029	0.515029	0.00828646	0.803835	0.699779							Ovarian	0.16025	0.0209268	5
Respiratory tree	26.86	22.93	27.34	23.14	20.28	21.6629	5.19715	1.26715	5.67715	0.0272586	0.415481	0.0195438							Testis	0.0262883	0.00366972	4
muscle	26.66	27.66	25.61	22.29	21.71	21.9981	4.66191	5.66191	3.61191	0.0395025	0.0197513	0.0817911	0.68494	0.120818	0.342331	0.088502	0.0994908	0.0129288
muscle	25.13	26.9	31.21	25.08	24.09	24.58	0.549984	2.31998	6.62998	0.683028	0.20027	0.0100966							Respiratory tree	0.391126	0.0505676	6
muscle	26.69	26.61	31.84	27.96	26.23	27.0812	-0.391189	-0.471189	4.75881	1.31147	1.38625	0.0369365							Muscle	0.342331	0.088502	6
muscle	25.61	27.83	28.86	26.96	25.95	26.4502	-0.84018	1.37982	2.40982	1.79027	0.384267	0.188179							Intestine	1.09807	0.247595	6
muscle	27.34	29.24	27.41	25.85	24.32	25.0733	2.26667	4.16667	2.33667	0.207809	0.0556811	0.197967							Neural ring	0.0103127	0.00122193	6
muscle	26.54	29.86	26.46	23.49	22.23	22.8513	3.68868	7.00868	3.60868	0.0775525	0.00776562	0.0819744							Ovarian	0.708575	0.0714693	5
intestine	25.43	23	22.13	24.95	19.91	22.288	3.14201	0.71201	-0.15799	0.113282	0.610469	1.11573	0.0317952	0.0069027	1.09807	0.247595	2.42949	0.265341	Testis	0.957576	0.136578	4
intestine	27.41	22.59	19.28	21.13	20.98	21.0549	6.35513	1.53513	-1.77487	0.0122156	0.345047	3.42206
intestine	29.45	22.48	22.18	23.78	25.29	24.5234	4.92662	-2.04338	-2.34338	0.0328806	4.1221	5.0749							Respiratory tree	0.648761	0.199339	6
intestine	29.39	22.44	20.61	21.34	21.52	21.4298	7.96019	1.01019	-0.819811	0.00401554	0.496481	1.76517							Muscle	0.0994908	0.0129288	6
intestine	27.43	22.69	20.76	22.62	21.39	21.9964	5.4336	0.693596	-1.2364	0.0231379	0.618311	2.35611							Intestine	2.42949	0.265341	6
intestine	28.75	22.51	21.42	21.42	20.93	21.1736	7.57642	1.33642	0.246417	0.00523927	0.396003	0.842987							Neural ring	5.94809	0.804582	6
anterior part	26.18	31.06	22.63	24.2	23.77	23.984	2.19596	7.07596	-1.35404	0.218247	0.00741178	2.55626	0.700973	0.20858	0.0103127	0.00122193	5.94809	0.804582	Ovarian	0.0968672	0.0317072	5
anterior part	26.82	30.8	21.47	25.52	25.26	25.3897	1.43033	5.41033	-3.91967	0.371045	0.0235141	15.1334							Testis	2.29992	0.161249	4
anterior part	25.52	29.08	20.91	22.95	22.44	22.6936	2.82643	6.38643	-1.78357	0.14098	0.0119534	3.44276
anterior part	24.49	32.75	25.03	27.25	25.17	26.1894	-1.69936	6.56064	-1.15936	3.24757	0.0105938	2.23358
anterior part	25.32	31.36	19.98	23.71	21.32	22.4833	2.83674	8.87674	-2.50326	0.139977	0.00212734	5.66967
anterior part	26.5	30.31	20.26	24.22	21.83	22.994	3.50603	7.31603	-2.73397	0.0880196	0.0062756	6.65283
ovary	28.75	24.36	29.32	24.61	23.48	24.0384	4.71164	0.321639	5.28164	0.0381641	0.80016	0.025708	0.16025	0.0209268	0.708575	0.0714693	0.0968672	0.0317072
ovary	26.18	23.14	24.84	25.07	22.3	23.6445	2.53553	-0.504471	1.19553	0.172476	1.4186	0.436626
ovary	27.01	26.26	34.7	26.86	23.83	25.2997	1.71032	0.96032	9.40032	0.305592	0.513943	0.00147986
ovary	28.08	24.3	28.6	22.64	23.2	22.9183	5.16171	1.38171	5.68171	0.0279364	0.383764	0.0194821
ovary	26.98	26.25	34.93	25.51	24.54	25.0203	1.9597	1.2297	9.9097	0.257082	0.426406	0.00103964
testis	27.83	22.63	20.96	22.26	21.25	21.9425	4.07748	0.937484	-0.672516	0.0592318	0.522143	1.59385	0.0262883	0.00366972	0.957576	0.136578	2.29992	0.161249
testis	28.02	22.62	20.71	22.24	21.43	21.8312	6.18876	0.788756	-1.12124	0.0137088	0.578843	2.17534
testis	26.02	22.88	21.27	23.8	20.23	23.5985	5.84153	-1.12847	-1.88847	0.0174392	2.18627	3.70244
testis	29.44	22.47	21.71	23.05	24.16	21.7491	6.08086	0.880862	-0.789138	0.0147733	0.543043	1.72804

## Sheet: Figure 7H APR
							δCT			2-δCT			AVERAGE	SE	AVERAGE	SE	AVERAGE	SE
	KISSR1	KISSR2	KP	TUBB	ACTIN	internal control	KISSR1	KISSR2	KP	KISSR1	KISSR2	KP	KISSR1	KISSR1	KISSR2	KISSR2	KP	KP
Respiratory tree	29.78	23.36	27.25	20.94	26.61	23.6054	6.17463	-0.245368	3.64463	0.0138436	1.1854	0.079957	0.0396784	0.00628101	0.54329	0.0569078	0.261297	0.0303979	Respiratory tree	0.0396784	0.00628101	6
Respiratory tree	29.36	27.66	26.97	23.82	27.99	25.821	3.53904	1.83904	1.14904	0.0860284	0.279507	0.450924							Muscle	0.185375	0.0254504	6
Respiratory tree	28.91	26.22	26.76	22.77	28.3	25.3849	3.52514	0.835142	1.37514	0.0868613	0.560528	0.385515							Intestine	0.0509755	0.00284584	6
Respiratory tree	29.83	23.01	26.15	19.54	22.81	21.1118	8.71822	1.89822	5.03822	0.00237441	0.268275	0.0304331							Neural ring	0.136715	0.030395	6
Respiratory tree	29.57	25.51	25.97	22.38	27.3	24.7179	4.85211	0.792112	1.25211	0.0346233	0.577498	0.419833							Ovarian	0.180954	0.0540155	6
Respiratory tree	29.37	24.61	25.56	21.15	25.55	23.2461	6.12387	1.36387	2.31387	0.0143394	0.388538	0.20112							Testis	0.0499947	0.00148817	6
muscle	29.02	25.97	25.73	23.32	27.98	25.544	3.47605	0.426046	0.186046	0.0898682	0.744299	0.879012	0.185375	0.0254504	0.760566	0.0546044	0.239383	0.0528989
muscle	26.9	24.54	27.53	22.81	27.2	24.9085	1.99153	-0.368472	2.62153	0.251472	1.29099	0.162496							Respiratory tree	0.54329	0.0569078	6
muscle	26.06	25.6	27.75	23.03	27.01	24.9407	1.11926	0.659264	2.80926	0.460329	0.633201	0.142668							Muscle	0.760566	0.0546044	6
muscle	28.25	24.7	28.35	22.16	24.71	23.4003	4.84971	1.29971	4.94971	0.034681	0.406208	0.0323585							Intestine	2.57921	0.261834	6
muscle	27.96	25.25	27.98	23.06	27.59	25.2235	2.73649	0.0264911	2.75649	0.150049	0.981805	0.147984							Neural ring	0.510203	0.0527948	6
muscle	27.16	25.15	27.97	22.59	25.86	24.1698	2.99024	0.980238	3.80024	0.125849	0.506896	0.0717818							Ovarian	0.604183	0.0679592	6
intestine	30.1	24.53	25.82	25.47	25.65	25.5598	4.54016	-1.02984	0.260158	0.042981	2.0418	0.834996	0.0509755	0.00284584	2.57921	0.261834	4.1817	0.646738	Testis	2.29873	0.130032	6
intestine	28.85	24.36	25.42	21.96	28.75	25.1267	3.72332	-0.766679	0.293321	0.0757127	1.70135	0.816021
intestine	30.64	23.1	25.94	22.3	29.07	25.461	5.17903	-2.36097	0.47903	0.027603	5.13716	0.71746							Respiratory tree	0.261297	0.0303979	6
intestine	30.03	25.5	23.27	24.47	27.51	25.9455	4.08449	-0.445514	-2.67551	0.058945	1.3618	6.38866							Muscle	0.239383	0.0528989	6
intestine	29.47	23.44	22.65	23.72	27.2	25.4005	4.06953	-1.96047	-2.75047	0.0595594	3.89189	6.72937							Intestine	4.1817	0.646738	6
intestine	30.33	25.3	22.46	23.39	28.29	25.7236	4.60641	-0.42359	-3.26359	0.0410518	1.34126	9.6037							Neural ring	1.42486	0.324231	6
anterior part	27.78	23.36	21.04	19.93	27.57	23.4408	4.33922	-0.0807786	-2.40078	0.0494042	1.05759	5.28088	0.136715	0.030395	0.510203	0.0527948	1.42486	0.324231	Ovarian	0.0321446	0.00603134	6
anterior part	24	24.2	23.05	19.99	26.43	22.9856	1.01445	1.21445	0.0644458	0.495018	0.430939	0.956313							Testis	4.18856	0.587803	6
anterior part	28.36	24.77	24.98	20.75	23.92	22.2787	6.08131	2.49131	2.70131	0.0147687	0.177845	0.153753
anterior part	26.72	24.11	25.51	20.23	25.97	22.921	3.79898	1.18898	2.58898	0.0718444	0.438612	0.166203
anterior part	25.89	23.78	22.77	19.96	27	23.2147	2.67535	0.565349	-0.444651	0.156545	0.675792	1.36098
anterior part	27.54	24.44	23.27	20.49	24.94	22.6058	4.93424	1.83424	0.664235	0.0327075	0.28044	0.631023
ovary	22.52	21.89	28.89	19.87	24.95	22.2656	0.25441	-0.37559	6.62441	0.83833	1.29737	0.0101357	0.180954	0.0540155	0.604183	0.0679592	0.0321446	0.00603134
ovary	28.78	23.67	28.51	19.71	26.27	22.7548	6.02518	0.915183	5.75518	0.0153546	0.530277	0.0185147
ovary	28.83	25.67	28.5	22.46	23.81	23.1252	5.70485	2.54485	5.37485	0.0191721	0.171366	0.0240996
ovary	26.71	23.74	30.39	20.68	25.01	22.7422	3.96782	0.997819	7.64782	0.0639098	0.500756	0.00498629
ovary	25.65	22.78	27.49	19.79	25.61	22.5127	3.13729	0.267295	4.97729	0.113653	0.830876	0.0317457
ovary	27.77	24.71	26.22	21.57	24.41	22.9461	4.8239	1.7639	3.2739	0.0353072	0.294452	0.103385
testis	29.86	24.88	23.09	24.24	27.42	25.4771	4.24288	-0.997119	0.222881	0.052816	1.99601	0.856853	0.0499947	0.00148817	2.29873	0.130032	4.18856	0.587803
testis	29.73	24	22.59	23.62	27.53	25.2289	4.16107	-1.23893	0.351072	0.0558975	2.36023	0.784001
testis	30.45	23.82	25.14	22.95	28.6	25.6197	4.83028	-1.79972	-0.479719	0.0351512	3.48152	1.39447
testis	29.57	24.72	22.03	22.35	28.08	25.781	4.07898	-0.901016	-2.69102	0.0591703	1.86738	6.45768
testis	29.72	24.48	25.7	24.42	26.58	25.5002	4.22983	-1.50017	-2.91017	0.0532959	2.82876	7.51706
testis	29.39	23.99	25.58	22.07	28.84	25.0517	4.51829	-0.331707	-3.02171	0.0436373	1.2585	8.12128

## Sheet: Figure 7H MAY
							δCT			2-δCT			AVERAGE	SE	AVERAGE	SE	AVERAGE	SE
	KISSR1	KISSR2	KP	TUBB	ACTIN	internal control	KISSR1	KISSR2	KP	KISSR1	KISSR2	KP	KISSR1	KISSR1	KISSR2	KISSR2	KP	KP
Respiratory tree	28.16	25.07	22.62	18.39	25.32	21.5786	6.58143	3.49143	1.04143	0.0104422	0.0889151	0.485847	0.0107599	0.00178136	0.237531	0.0347525	0.200901	0.035005	Respiratory tree	0.0107599	0.00178136	6
Respiratory tree	29.11	25.61	25.25	21	27.48	24.0225	5.08751	1.58751	1.22751	0.0294108	0.332745	0.427054							Muscle	0.0015349	0.00048377	6
Respiratory tree	29.54	23.55	25.27	19.22	27.06	22.8056	6.73445	0.744448	2.46445	0.00939137	0.596896	0.181187							Intestine	0.00193435	0.000184732	6
Respiratory tree	30.26	23.61	28.63	18.07	19.99	19.0058	11.2542	4.60423	9.62423	0.000409392	0.0411139	0.00126712							Neural ring	0.00607028	0.000629661	6
Respiratory tree	29.63	22.33	27.46	16.49	22.03	19.0598	10.5702	3.27023	8.40023	0.000657722	0.103648	0.0029599							Ovarian	0.189607	0.0267734	6
Respiratory tree	28.94	24.74	26.03	19.54	26.62	22.8069	6.1331	1.9331	3.2231	0.014248	0.261866	0.107091							Testis	0.00196672	0.000154842	6
muscle	37.26	25.47	27.85	19.98	25.1	22.3942	14.8658	3.07585	5.45585	3.34914e-05	0.118598	0.0227838	0.0015349	0.00048377	0.14169	0.0108468	0.332407	0.0627915
muscle	32.99	28.55	27.74	23.29	28.84	25.9169	7.07314	2.63314	1.82314	0.0074263	0.161193	0.282605							Respiratory tree	0.237531	0.0347525	6
muscle	36.74	27.96	24.94	21.99	28.31	24.9507	11.7893	3.00931	-0.0106894	0.00028253	0.124196	1.00744							Muscle	0.14169	0.0108468	6
muscle	37.34	28.61	27.56	22.98	26.12	24.4997	12.8403	4.11025	3.06025	0.000136364	0.0579016	0.119887							Intestine	0.866034	0.0765906	6
muscle	37.11	28.99	27.99	24.95	29.26	27.0192	10.0908	1.9708	0.970803	0.000916992	0.255111	0.510222							Neural ring	0.233247	0.0196192	6
muscle	35.66	27.33	28.7	21.75	27.42	24.421	11.239	2.909	4.279	0.000413735	0.133138	0.05151							Ovarian	0.225183	0.0288966	6
intestine	34.61	24.57	29.11	22.85	27.04	24.8569	9.75313	-0.28687	4.25313	0.00115882	1.21999	0.0524421	0.00193435	0.000184732	0.866034	0.0765906	0.236633	0.0351836	Testis	0.736425	0.0429595	6
intestine	33.16	23.5	29.35	19.39	24.72	21.8934	11.2666	1.6066	7.4566	0.000405896	0.32837	0.00569297
intestine	34.04	25.33	27.04	22.23	29.4	25.5649	8.47514	-0.234859	1.47514	0.00281014	1.17679	0.359698							Respiratory tree	0.200901	0.035005	6
intestine	33.09	26.13	27.88	22.37	26.55	24.3705	8.71945	1.75945	3.50945	0.00237237	0.29536	0.087811							Muscle	0.332407	0.0627915	6
intestine	32.45	23.82	25.44	21.09	27.85	24.2354	8.21456	-0.415439	1.20456	0.00336644	1.3337	0.433901							Intestine	0.236633	0.0351836	6
intestine	33.94	24.8	25.61	21.49	28.05	24.5519	9.38813	0.248126	1.05813	0.00149242	0.841989	0.480255							Neural ring	0.808764	0.157819	6
anterior part	32.3	26	26.19	21.35	28.87	24.8269	7.47311	1.17311	1.36311	0.00562821	0.443465	0.388744	0.00607028	0.000629661	0.233247	0.0196192	0.808764	0.157819	Ovarian	0.312873	0.0487652	6
anterior part	33.1	28.71	27.27	23.62	29.18	26.2532	6.84678	2.45678	1.01678	0.00868789	0.182153	0.494218							Testis	0.221165	0.0324802	6
anterior part	30.86	26.98	26.4	21.76	27.55	24.4844	6.37556	2.49556	1.91556	0.0120439	0.177322	0.26507
anterior part	32.95	25.66	26.48	20.53	27.21	23.6352	9.31483	2.02483	2.84483	0.00157021	0.245734	0.139194
anterior part	32.95	27.33	23.94	21.89	29.37	25.3557	7.59434	1.97434	-1.41566	0.00517458	0.254486	2.66781
anterior part	32.09	27.23	24.01	22.58	25.2	23.8541	8.23594	3.37594	0.155944	0.00331691	0.0963251	0.897545
ovary	28.44	26.06	27.3	20.9	26.96	23.7374	4.7026	2.3226	3.5626	0.0384039	0.199906	0.0846349	0.189607	0.0267734	0.225183	0.0288966	0.312873	0.0487652
ovary	27.74	28.47	28.11	21.68	25.74	23.6229	4.11706	4.84706	4.48706	0.057629	0.0347447	0.0445923
ovary	28.43	27.99	25.85	21.89	29.44	25.3859	3.04415	2.60415	0.464146	0.121233	0.164465	0.7249
ovary	27.51	28.76	27.85	23.44	28.88	26.0182	1.49179	2.74179	1.83179	0.355571	0.149499	0.280916
ovary	26.89	26.52	28.71	24.21	27.17	25.6473	1.24267	0.872667	3.06267	0.422591	0.546136	0.119687
ovary	28.33	27.48	26.2	22.32	29.17	25.5162	2.81384	1.96384	0.68384	0.142216	0.256345	0.622506
testis	33.75	25.57	27.29	22.27	28.55	23.9728	10.2072	0.277234	5.20723	0.000845895	0.825171	0.0270686	0.00196672	0.000154842	0.736425	0.0429595	0.221165	0.0324802
testis	32.9	25.43	27.15	21.98	26.94	22.9972	10.4228	1.0528	5.6628	0.000728492	0.482032	0.0197391
testis	34.18	24.25	29.18	21.81	26.35	25.2152	8.53476	0.354757	2.07476	0.00269639	0.782002	0.237376
testis	33.44	25.16	25.78	21.45	28.3	24.334	8.56605	1.09605	2.81605	0.00263853	0.467796	0.141999
testis	33.42	24.05	28.66	20.24	26.13	24.3305	8.55954	-0.220456	1.15954	0.00265046	1.1651	0.447654
testis	32.89	24.11	25.49	21.21	27.91	24.6381	8.80192	0.52192	1.14192	0.00224057	0.696444	0.453156

## Sheet: Figure 7H JUN
							δCT			2-δCT			AVERAGE	SE	AVERAGE	SE	AVERAGE	SE
	KISSR1	KISSR2	KP	TUBB	ACTIN	internal control	KISSR1	KISSR2	KP	KISSR1	KISSR2	KP	KISSR1	KISSR1	KISSR2	KISSR2	KP	KP
Respiratory tree	33.1	24.77	31.19	22	25.3	23.5924	9.50763	1.17763	7.59763	0.00137378	0.442078	0.00516281	0.0822458	0.0227482	0.766838	0.113411	0.0188024	0.00524701	Respiratory tree	0.0822458	0.0227482	6
Respiratory tree	25.84	23.79	26.75	21.21	25.25	23.142	2.69799	0.647993	3.60799	0.154107	0.638168	0.0820136							Muscle	0.0331241	0.00757621	6
Respiratory tree	33.7	25.17	31.73	22.91	26.49	24.6351	9.06495	0.534946	7.09495	0.00186715	0.690185	0.0073149							Intestine	0.159749	0.0382871	6
Respiratory tree	32.73	24.96	31.1	21.94	21.32	21.6278	11.1022	3.33222	9.47222	0.000454882	0.0992891	0.00140792							Neural ring	0.0873644	0.0268728	6
Respiratory tree	31.8	24.48	34.71	21.91	25.98	23.8584	7.94163	0.62163	10.8516	0.00406753	0.649936	0.00054117							Ovarian	0.403493	#DIV/0!	1
Respiratory tree	26.31	23.66	30.65	22.67	26.95	24.7175	1.59247	-1.05753	5.93247	0.331604	2.08137	0.0163738							Testis	0	0	0
muscle	30.45	23.75	29.02	22.15	28.87	25.2878	5.16225	-1.53775	3.73225	0.027926	2.90342	0.0752458	0.0331241	0.00757621	0.873734	0.177701	0.287842	0.0791169
muscle	33.1	31.29	30.33	24.5	28.92	26.6184	6.48159	4.67159	3.71159	0.0111905	0.0392385	0.0763311							Respiratory tree	0.766838	0.113411	6
muscle	31	25.87	26.94	23.03	27.88	25.3392	5.66077	0.530773	1.60077	0.0197668	0.692184	0.3297							Muscle	0.873734	0.177701	6
muscle	29.37	24.47	29.21	21.44	22.79	22.1047	7.2653	2.3653	7.1053	0.00650018	0.194076	0.00726257							Intestine	1.18024	0.190656	6
muscle	30.58	25.46	30.1	22.88	24.68	23.763	6.81704	1.69704	6.33704	0.00886885	0.308419	0.0123698							Neural ring	1.08356	0.15861	6
muscle	31.31	28.16	28.01	25.09	31.93	28.3041	3.00587	-0.144129	-0.294129	0.124492	1.10506	1.22614							Ovarian	0.241587	#DIV/0!	1
intestine	33.01	26.79	30.21	23.16	34.92	28.4385	4.57152	-1.64848	1.77152	0.0420567	3.13503	0.2929	0.159749	0.0382871	1.18024	0.190656	0.067021	0.0190578	Testis	0	0	0
intestine	23.36	23.5	31.75	20.24	25.08	22.5304	0.829594	0.969594	9.21959	0.562688	0.51065	0.00167736
intestine	28.93	24.68	27.94	20.95	27.96	24.2025	4.72748	0.477479	3.73748	0.0377474	0.718231	0.0749733							Respiratory tree	0.0188024	0.00524701	6
intestine	31.53	24.31	32.06	20.7	25.26	22.8666	8.66339	1.44339	9.19339	0.00246638	0.367703	0.00170811							Muscle	0.287842	0.0791169	6
intestine	29.75	22.22	31.1	19.16	22.27	20.6566	9.09345	1.56345	10.4434	0.00183063	0.338342	0.00071814							Intestine	0.067021	0.0190578	6
intestine	27.07	24.38	30.44	22.49	28.66	25.3883	1.68175	-1.00825	5.05175	0.311705	2.01147	0.030149							Neural ring	0.178285	0.0377693	6
anterior part	32.28	26.61	31.29	22.87	32.59	27.3008	4.97921	-0.690793	3.98921	0.0317037	1.61417	0.0629693	0.0873644	0.0268728	1.08356	0.15861	0.178285	0.0377693	Ovarian	0.0059233	#DIV/0!	1
anterior part	32.82	24.87	32.23	21.01	29.51	24.8999	7.9201	-0.0299016	7.3301	0.0041287	1.02094	0.0062147							Testis	0	0	0
anterior part	29.62	26.85	25.26	20.72	27.33	23.7966	5.82341	3.05341	1.46341	0.0176595	0.120457	0.362634
anterior part	31.93	26.12	28.89	21.5	28.93	24.9398	6.99017	1.18017	3.95017	0.0078659	0.441299	0.0646963
anterior part	31.26	27.64	27.73	22.98	31.44	26.8792	4.3808	0.760804	0.850804	0.0480006	0.590168	0.554476
anterior part	27.27	24.56	31.74	22.64	29.86	26.0006	1.26942	-1.44058	5.73942	0.414828	2.71431	0.0187182
ovary	21.69	22.43	27.78	17.85	23.27	20.3806	1.30938	2.04938	7.39938	0.403493	0.241587	0.0059233	0.403493	#DIV/0!	0.241587	#DIV/0!	0.0059233	#DIV/0!

## Sheet: Figure 7H AUG
							δCT			2-δCT			AVERAGE	SE	AVERAGE	SE	AVERAGE	SE
	KISSR1	KISSR2	KP	TUBB	ACTIN	internal control	KISSR1	KISSR2	KP	KISSR1	KISSR2	KP	KISSR1	KISSR1	KISSR2	KISSR2	KP	KP
Respiratory tree	29.75	25.98	29.39	21.78	25.35	23.4973	6.2527	2.4827	5.8927	0.0131144	0.178909	0.0168314	0.00812593	0.00120116	0.36082	0.0290661	0.024101	0.0041588	Respiratory tree	0.00812593	0.00120116	6
Respiratory tree	32.11	24.02	29.6	21.7	24.92	23.2543	8.85567	0.765667	6.34567	0.00215863	0.588181	0.012296							Muscle	0.146199	0.0149263	6
Respiratory tree	31.91	25.68	29.99	20.87	25.56	23.0963	8.81374	2.58374	6.89374	0.00222228	0.166808	0.00840964							Intestine	0.0951328	0.0292805	6
Respiratory tree	31.42	27.59	29.57	23.35	28.5	25.7968	5.6232	1.7932	3.7732	0.0202884	0.288532	0.0731399							Neural ring	0.0583234	0.0146489	6
Respiratory tree	32.22	25.48	29.64	21.76	27.32	24.382	7.83797	1.09797	5.25797	0.00437054	0.467172	0.0261332							Ovarian	0	0	0
Respiratory tree	30.81	24.64	30.57	21.97	25.28	23.567	7.24304	1.07304	7.00304	0.00660127	0.475316	0.00779605							Testis	0	0	0
muscle	29.41	24.59	31.47	21.44	24.97	23.1378	6.27222	1.45222	8.33222	0.0129382	0.365458	0.00310278	0.146199	0.0149263	0.509345	0.056488	0.531596	0.145044
muscle	27.37	23.91	30.64	21.92	25.04	23.4281	3.94188	0.48188	7.21188	0.0650693	0.716044	0.0067454							Respiratory tree	0.36082	0.0290661	6
muscle	28.12	25.8	29.21	23.79	27.93	25.777	2.34298	0.0229812	3.43298	0.197103	0.984197	0.0925912							Muscle	0.509345	0.056488	6
muscle	29.66	27.51	28.29	24.69	29.34	26.9148	2.74523	0.595235	1.37523	0.149143	0.661937	0.38549							Intestine	0.21551	0.0377583	6
muscle	29.81	29.61	26.56	25.38	30.32	27.7403	2.06975	1.86975	-1.18025	0.238201	0.273621	2.26616							Neural ring	0.198855	0.0222617	6
muscle	29.26	31.23	28.24	26.34	27.76	27.0407	2.21932	4.18932	1.19932	0.214743	0.0548137	0.435481							Ovarian	0	0	0
intestine	29.46	28.34	30.31	23.15	26.72	24.871	4.58897	3.46897	5.43897	0.041551	0.0903099	0.0230519	0.0951328	0.0292805	0.21551	0.0377583	0.0233553	0.0035301	Testis	0	0	0
intestine	30.14	25.93	31.73	22.97	23.32	23.1443	6.99566	2.78566	8.58566	0.00783603	0.145021	0.00260291
intestine	29.71	26.97	32.41	22.94	22.69	22.8147	6.89534	4.15534	9.59534	0.00840031	0.05612	0.00129275							Respiratory tree	0.024101	0.0041588	6
intestine	30.92	27.1	30.7	24.35	25.91	25.1179	5.80211	1.98211	5.58211	0.0179222	0.25312	0.0208746							Muscle	0.531596	0.145044	6
intestine	30.03	26.09	29.59	23.19	28	25.4818	4.54824	0.608242	4.10824	0.0427408	0.655996	0.0579824							Intestine	0.0233553	0.0035301	6
intestine	30.61	32.9	34.33	27.89	31.13	29.4655	1.1445	3.4345	4.8645	0.452346	0.0924938	0.0343273							Neural ring	0.0414509	0.00369746	6
anterior part	32.88	29.46	33.59	25.46	29.1	27.2192	5.66078	2.24078	6.37078	0.0197668	0.211572	0.0120838	0.0583234	0.0146489	0.198855	0.0222617	0.0414509	0.00369746	Ovarian	0	0	0
anterior part	31.97	30.71	31.45	24.89	30.64	27.6157	4.35425	3.09425	3.83425	0.0488922	0.117095	0.0701093							Testis	0	0	0
anterior part	32.93	28.93	31.31	22.84	31	26.609	6.32098	2.32098	4.70098	0.0125082	0.200132	0.0384472
anterior part	31.83	29.21	29.64	21.75	30.19	25.6248	6.20516	3.58516	4.01516	0.0135538	0.083322	0.0618467
anterior part	32.75	28.22	32.53	23.19	31.61	27.0746	5.67536	1.14536	5.45536	0.0195679	0.452076	0.0227914
anterior part	28.94	29.81	31.38	25.34	28.46	26.8547	2.08527	2.95527	4.52527	0.235652	0.128936	0.0434267

## Sheet: Figure 7H COMBINED
ApojaKissR1		NOV			DEC			FEB			MAR			APR			MAY			JUN			AUG
	Respiratory tree	0.0629913	0.0198756	6	0.243399	0.0163003	6	0.988586	0.176304	6	0.033328	0.004605	6	0.0396784	0.00628101	6	0.0107599	0.00178136	6	0.0822458	0.0227482	6	0.00812593	0.00120116	6
	Muscle	0.0438516	0.00845084	6	0.122027	0.0143694	6	0.773701	0.168038	6	0.68494	0.120818	6	0.185375	0.0254504	6	0.0015349	0.00048377	6	0.0331241	0.00757621	6	0.146199	0.0149263	6
	Intestine	0.14136	0.0466877	6	0.00253785	0.00044018	6	0.0247006	0.00355364	6	0.0317952	0.0069027	6	0.0509755	0.00284584	6	0.00193435	0.000184732	6	0.159749	0.0382871	6	0.0951328	0.0292805	6
	Anterior part	0.0355792	0.00508277	6	0.808165	0.129801	6	0.637324	0.103713	6	0.700973	0.20858	6	0.136715	0.030395	6	0.00607028	0.000629661	6	0.0873644	0.0268728	6	0.0583234	0.0146489	6
	Ovarian	0.0103844	#DIV/0!	1	6.70326e-05	7.88716e-06	3	0.255492	0.0263465	3	0.16025	0.0209268	5	0.180954	0.0540155	6	0.189607	0.0267734	6	0.403493	#DIV/0!	1	0	0	0
	Testis	0.0267398	0.00425945	2	0.00142997	7.35572e-05	2	0.0195888	0.00116345	4	0.0262883	0.00366972	4	0.0499947	0.00148817	6	0.00196672	0.000154842	6	0	0	0	0	0	0
ApojaKissR2	Respiratory tree	0.223762	0.0173827	6	0.129179	0.0108206	6	1.09427	0.192279	6	0.391126	0.0505676	6	0.54329	0.0569078	6	0.237531	0.0347525	6	0.766838	0.113411	6	0.36082	0.0290661	6
	Muscle	0.0605298	0.00704386	6	0.265614	0.0323501	6	0.518669	0.124872	6	0.342331	0.088502	6	0.760566	0.0546044	6	0.14169	0.0108468	6	0.873734	0.177701	6	0.509345	0.056488	6
	Intestine	0.177168	0.0176964	6	0.278232	0.0985611	6	3.20117	0.349166	6	1.09807	0.247595	6	2.57921	0.261834	6	0.866034	0.0765906	6	1.18024	0.190656	6	0.21551	0.0377583	6
	Anterior part	0.14624	0.00650643	6	0.00295566	0.000547069	6	0.119192	0.0151883	6	0.0103127	0.00122193	6	0.510203	0.0527948	6	0.233247	0.0196192	6	1.08356	0.15861	6	0.198855	0.0222617	6
	Ovarian	0.0215011	#DIV/0!	1	0.000232502	4.34334e-05	3	0.213452	0.0103128	3	0.708575	0.0714693	5	0.604183	0.0679592	6	0.225183	0.0288966	6	0.241587	0	1	0	0	0
	Testis	0.315718	0.0112606	2	0.0405755	0.00330521	2	2.7883	0.266516	4	0.957576	0.136578	4	2.29873	0.130032	6	0.736425	0.0429595	6	0	1	0	0	0	0
ApojaKiss1	Respiratory tree	0.000642236	9.41836e-05	6	0.509102	0.0527536	6	0.926763	0.212791	6	0.648761	0.199339	6	0.261297	0.0303979	6	0.200901	0.035005	6	0.0188024	0.00524701	6	0.024101	0.0041588	6
	Muscle	0.0151001	0.00279289	6	0.166372	0.0607584	6	0.0853624	0.0111828	6	0.0994908	0.0129288	6	0.239383	0.0528989	6	0.332407	0.0627915	6	0.287842	0.0791169	6	0.531596	0.145044	6
	Intestine	0.0615906	0.0149568	6	0.194104	0.0335307	6	2.03817	0.297411	6	2.42949	0.265341	6	4.1817	0.646738	6	0.236633	0.0351836	6	0.067021	0.0190578	6	0.0233553	0.0035301	6
	Anterior part	0.104205	0.0161914	6	19.1014	4.88182	6	8.97004	0.98823	6	5.94809	0.804582	6	1.42486	0.324231	6	0.808764	0.157819	6	0.178285	0.0377693	6	0.0414509	0.00369746	6
	Ovarian	0.000183817	#DIV/0!	1	0.0675786	0.00180817	3	0.26507	0.00965415	3	0.0968672	0.0317072	5	0.0321446	0.00603134	6	0.312873	0.0487652	6	0.0059233	0	1	0	0	0
	Testis	0.110472	0.00899886	2	0.0948603	0.0011613	2	1.7332	0.124637	4	2.29992	0.161249	4	4.18856	0.587803	6	0.221165	0.0324802	6	0	1	0	0	0	0

[truncated: 1 more sheets: Figure 7H Final]
